# Supplementary material for: Using Genome-Wide Association Analysis to Characterize Environmental Sensitivity of Milk Traits in Dairy Cattle
Source: PubMed Central journal article supplement (PMC3704237; doi:10.1534/g3.113.006536), 2013-07-01
Supplement: supp_g3.113.006536_FigureS1.pdf [file supp_g3.113.006536_FigureS1.pdf]

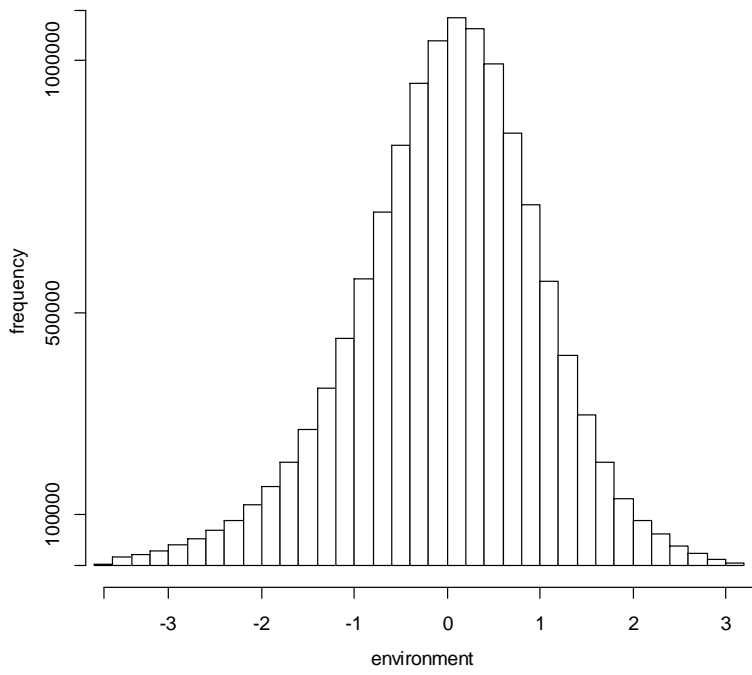

**Figure S1** Histogram of the environmental descriptor milk energy yield.
