# Supplementary material for: Using Genome-Wide Association Analysis to Characterize Environmental Sensitivity of Milk Traits in Dairy Cattle
Source: PubMed Central journal article supplement (PMC3704237; doi:10.1534/g3.113.006536), 2013-07-01
Supplement: supp_g3.113.006536_TableS1.pdf [file supp_g3.113.006536_TableS1.pdf]

**Table S1 Validated SNPs with chromosome (BTA), position in base pairs (bp), F-values and effects for intercept and slope.** Effect estimates were taken from the validation set. Validated SNPs are indicated in bold type F-values and effect estimates.

| SNP name               | BTA | bp        | F-values in discovery dataset |              | Effects (in $\sigma$ ) |              |
|------------------------|-----|-----------|-------------------------------|--------------|------------------------|--------------|
|                        |     |           | Intercept                     | Slope        | Intercept              | Slope        |
| <b>Protein yield</b>   |     |           |                               |              |                        |              |
| ARS-BFGL-NGS-54077     | 1   | 87338372  | 7.09                          | <b>10.96</b> | 0.094                  | <b>0.148</b> |
| ARS-BFGL-BAC-7205      | 1   | 120983738 | <b>15.75</b>                  | <b>16.35</b> | <b>0.117</b>           | <b>0.104</b> |
| ARS-BFGL-NGS-99492     | 1   | 121607486 | <b>16.95</b>                  | <b>16.54</b> | <b>0.125</b>           | <b>0.126</b> |
| ARS-BFGL-BAC-13578     | 1   | 121811393 | <b>13.78</b>                  | 7.48         | <b>0.121</b>           | 0.102        |
| ARS-BFGL-NGS-98257     | 1   | 127680108 | <b>13.65</b>                  | 4.44         | <b>0.109</b>           | 0.075        |
| ARS-BFGL-NGS-86079     | 2   | 19126180  | <b>15.75</b>                  | 6.79         | <b>0.136</b>           | 0.114        |
| Hapmap53232-rs29020795 | 2   | 19202356  | <b>14.56</b>                  | 9.90         | <b>0.130</b>           | 0.109        |
| Hapmap43615-BTA-54400  | 2   | 19255900  | <b>11.87</b>                  | 7.53         | <b>0.139</b>           | 0.106        |
| Hapmap60669-rs29018484 | 2   | 20687353  | <b>16.88</b>                  | 15.06        | <b>0.222</b>           | 0.140        |
| BTA-101354-no-rs       | 2   | 58818593  | 10.96                         | <b>11.72</b> | 0.067                  | <b>0.116</b> |
| Hapmap28102-BTA-152636 | 2   | 58842740  | 10.84                         | <b>11.37</b> | 0.069                  | <b>0.116</b> |
| ARS-BFGL-NGS-113152    | 4   | 14644971  | <b>10.88</b>                  | 8.87         | <b>0.143</b>           | 0.139        |
| ARS-BFGL-NGS-68464     | 5   | 18395406  | <b>12.71</b>                  | 10.07        | <b>0.145</b>           | 0.090        |
| Hapmap33079-BTA-163567 | 6   | 1936      | <b>15.61</b>                  | 5.94         | <b>0.142</b>           | 0.068        |
| Hapmap54442-rs29025673 | 6   | 31579806  | <b>14.14</b>                  | 8.19         | <b>0.102</b>           | 0.092        |
| Hapmap27701-BTC-050761 | 6   | 40183166  | <b>12.68</b>                  | 8.34         | <b>0.126</b>           | 0.094        |
| Hapmap31819-BTA-156590 | 6   | 40421547  | <b>13.80</b>                  | 9.11         | <b>0.126</b>           | 0.094        |
| Hapmap23201-BTC-072836 | 6   | 40655229  | <b>21.27</b>                  | 17.26        | <b>0.113</b>           | 0.095        |
| Hapmap32946-BTC-046820 | 6   | 41129701  | <b>27.71</b>                  | 15.88        | <b>0.137</b>           | 0.086        |
| ARS-BFGL-NGS-39570     | 6   | 46320087  | <b>14.72</b>                  | 3.26         | <b>0.169</b>           | 0.159        |
| ARS-BFGL-NGS-43679     | 6   | 109680595 | <b>13.67</b>                  | 4.00         | <b>0.140</b>           | 0.054        |
| BTB-00281303           | 6   | 111612203 | <b>15.07</b>                  | 2.41         | <b>0.153</b>           | 0.090        |
| ARS-BFGL-NGS-113181    | 7   | 62800839  | <b>12.32</b>                  | 10.78        | <b>0.129</b>           | 0.108        |
| ARS-BFGL-NGS-113819    | 7   | 63609102  | <b>15.25</b>                  | 6.29         | <b>0.153</b>           | 0.089        |
| ARS-BFGL-NGS-109819    | 7   | 63664393  | <b>15.72</b>                  | 5.91         | <b>0.154</b>           | 0.086        |
| ARS-BFGL-NGS-4062      | 8   | 5505897   | 6.17                          | <b>11.71</b> | 0.116                  | <b>0.122</b> |
| Hapmap44053-BTA-28733  | 8   | 6369477   | <b>15.90</b>                  | <b>14.16</b> | <b>0.118</b>           | <b>0.133</b> |
| BTB-00389006           | 9   | 39062436  | 16.19                         | <b>16.89</b> | 0.097                  | <b>0.124</b> |
| BTA-06997-rs29021351   | 9   | 40153426  | <b>24.71</b>                  | 22.35        | <b>0.220</b>           | 0.154        |
| BTA-83317-no-rs        | 9   | 40393986  | <b>26.22</b>                  | 21.89        | <b>0.114</b>           | 0.081        |
| BTA-83528-no-rs        | 9   | 41691114  | <b>25.23</b>                  | 18.48        | <b>0.170</b>           | 0.112        |
| ARS-BFGL-NGS-37982     | 9   | 44200288  | <b>22.50</b>                  | 15.00        | <b>0.105</b>           | 0.084        |
| ARS-BFGL-NGS-52530     | 9   | 44230587  | <b>25.27</b>                  | <b>25.92</b> | <b>0.215</b>           | <b>0.185</b> |
| ARS-BFGL-NGS-103934    | 9   | 44255942  | <b>17.63</b>                  | 17.33        | <b>0.162</b>           | 0.115        |
| Hapmap57331-rs29009884 | 9   | 45457232  | 14.35                         | <b>12.31</b> | 0.072                  | <b>0.096</b> |
| ARS-BFGL-NGS-75844     | 9   | 45497534  | 14.31                         | <b>12.54</b> | 0.072                  | <b>0.096</b> |
| ARS-BFGL-NGS-39444     | 9   | 45590254  | 14.31                         | <b>12.54</b> | 0.072                  | <b>0.096</b> |
| BTA-10828-no-rs        | 9   | 46600974  | 24.59                         | <b>23.15</b> | 0.096                  | <b>0.105</b> |
| BTA-83605-no-rs        | 9   | 48362593  | <b>13.56</b>                  | 10.43        | <b>0.116</b>           | 0.103        |
| BTB-00391835           | 9   | 52160813  | <b>11.20</b>                  | 5.70         | <b>0.157</b>           | 0.085        |
| ARS-BFGL-NGS-25071     | 9   | 75512134  | 7.97                          | <b>11.90</b> | 0.051                  | <b>0.107</b> |
| ARS-BFGL-NGS-80176     | 10  | 64041482  | <b>12.30</b>                  | 9.49         | <b>0.121</b>           | 0.129        |
| ARS-BFGL-NGS-88689     | 11  | 29901111  | 7.53                          | <b>12.41</b> | 0.123                  | <b>0.143</b> |
| ARS-BFGL-NGS-87426     | 11  | 30070765  | <b>11.73</b>                  | <b>12.74</b> | <b>0.114</b>           | <b>0.127</b> |
| ARS-BFGL-NGS-21332     | 11  | 30108643  | 8.61                          | <b>12.87</b> | 0.120                  | <b>0.132</b> |
| ARS-BFGL-NGS-118724    | 11  | 30366110  | <b>12.45</b>                  | 10.44        | <b>0.107</b>           | 0.121        |
| ARS-BFGL-NGS-112015    | 13  | 63235775  | <b>13.16</b>                  | 2.09         | <b>0.108</b>           | 0.050        |
| Hapmap54034-rs29026486 | 13  | 65183781  | <b>11.97</b>                  | 4.07         | <b>0.106</b>           | 0.073        |

|                        |    |          |              |              |              |              |
|------------------------|----|----------|--------------|--------------|--------------|--------------|
| ARS-BFGL-NGS-63777     | 13 | 67075815 | <b>21.53</b> | <b>17.56</b> | <b>0.200</b> | <b>0.157</b> |
| ARS-BFGL-NGS-103635    | 13 | 67816926 | <b>11.00</b> | 1.02         | <b>0.104</b> | 0.059        |
| ARS-BFGL-NGS-52851     | 13 | 77352863 | 11.87        | <b>16.39</b> | 0.048        | <b>0.110</b> |
| Hapmap38308-BTA-33903  | 13 | 77756882 | 4.13         | <b>11.00</b> | 0.045        | <b>0.102</b> |
| Hapmap30383-BTC-005848 | 14 | 76704    | <b>45.65</b> | <b>31.66</b> | <b>0.168</b> | <b>0.134</b> |
| BTA-34956-no-rs        | 14 | 101474   | <b>20.91</b> | 7.85         | <b>0.129</b> | 0.112        |
| ARS-BFGL-NGS-57820     | 14 | 236533   | <b>72.24</b> | <b>56.71</b> | <b>0.193</b> | <b>0.148</b> |
| ARS-BFGL-NGS-34135     | 14 | 260342   | <b>33.61</b> | 18.35        | <b>0.114</b> | 0.095        |
| ARS-BFGL-NGS-94706     | 14 | 281534   | <b>32.30</b> | 17.16        | <b>0.118</b> | 0.093        |
| ARS-BFGL-NGS-4939      | 14 | 443936   | <b>76.22</b> | <b>55.93</b> | <b>0.189</b> | <b>0.138</b> |
| ARS-BFGL-NGS-107379    | 14 | 679601   | <b>61.01</b> | <b>51.65</b> | <b>0.158</b> | <b>0.122</b> |
| Hapmap25384-BTC-001997 | 14 | 835055   | <b>27.13</b> | 16.99        | <b>0.117</b> | 0.070        |
| Hapmap24715-BTC-001973 | 14 | 856890   | <b>22.88</b> | 13.75        | <b>0.116</b> | 0.073        |
| ARS-BFGL-NGS-103064    | 14 | 1193335  | <b>23.15</b> | 9.03         | <b>0.109</b> | 0.060        |
| Hapmap25486-BTC-072553 | 14 | 1285036  | <b>19.13</b> | 8.43         | <b>0.115</b> | 0.083        |
| ARS-BFGL-BAC-20965     | 14 | 5225005  | <b>14.28</b> | 8.91         | <b>0.136</b> | 0.104        |
| Hapmap23851-BTC-048718 | 14 | 5387835  | <b>17.21</b> | 16.92        | <b>0.126</b> | 0.095        |
| BTB-01988444           | 14 | 56535371 | 3.95         | <b>11.67</b> | 0.092        | <b>0.126</b> |
| ARS-BFGL-NGS-100131    | 15 | 21041772 | 9.75         | <b>11.06</b> | 0.099        | <b>0.132</b> |
| BTB-01698088           | 16 | 9738423  | 11.05        | <b>16.13</b> | 0.086        | <b>0.139</b> |
| ARS-BFGL-NGS-56645     | 16 | 23920210 | <b>15.37</b> | 5.10         | <b>0.117</b> | 0.092        |
| BTA-38367-no-rs        | 16 | 26379579 | <b>12.89</b> | 9.03         | <b>0.096</b> | 0.082        |
| ARS-BFGL-NGS-41039     | 16 | 27619045 | <b>14.91</b> | 5.09         | <b>0.183</b> | 0.109        |
| ARS-BFGL-NGS-38023     | 16 | 33318455 | <b>18.15</b> | 9.91         | <b>0.107</b> | 0.104        |
| ARS-BFGL-NGS-26559     | 16 | 33367687 | <b>11.43</b> | 6.70         | <b>0.124</b> | 0.112        |
| ARS-BFGL-NGS-59645     | 16 | 73117625 | <b>15.94</b> | 10.48        | <b>0.124</b> | 0.092        |
| BTA-97501-no-rs        | 18 | 57095120 | <b>16.33</b> | 8.05         | <b>0.108</b> | 0.069        |
| ARS-BFGL-NGS-15837     | 18 | 62533851 | <b>11.11</b> | 4.42         | <b>0.110</b> | 0.118        |
| ARS-BFGL-BAC-33672     | 20 | 44108671 | 10.68        | <b>12.05</b> | 0.152        | <b>0.185</b> |
| BTA-17135-no-rs        | 20 | 49557519 | 11.88        | <b>16.26</b> | 0.132        | <b>0.175</b> |
| BTA-41516-no-rs        | 20 | 49593049 | 10.63        | <b>15.64</b> | 0.117        | <b>0.165</b> |
| BTB-01251603           | 20 | 50418473 | 9.19         | <b>12.88</b> | 0.172        | <b>0.198</b> |
| ARS-BFGL-BAC-34291     | 20 | 54837742 | 8.66         | <b>13.62</b> | 0.123        | <b>0.152</b> |
| Hapmap53927-rs29025287 | 20 | 56464296 | 8.94         | <b>13.45</b> | 0.135        | <b>0.179</b> |
| BTB-00787949           | 20 | 56494412 | 5.89         | <b>12.27</b> | 0.150        | <b>0.186</b> |
| ARS-BFGL-BAC-36842     | 20 | 58820614 | 6.51         | <b>14.46</b> | 0.097        | <b>0.146</b> |
| ARS-BFGL-NGS-38258     | 20 | 60185080 | <b>11.42</b> | 7.68         | <b>0.138</b> | 0.119        |
| BTA-12959-no-rs        | 21 | 10922512 | <b>13.46</b> | 9.60         | <b>0.114</b> | 0.104        |
| ARS-BFGL-NGS-101900    | 21 | 30314497 | <b>14.12</b> | 4.85         | <b>0.106</b> | 0.099        |
| ARS-BFGL-NGS-110044    | 21 | 30892171 | <b>11.81</b> | 2.78         | <b>0.158</b> | 0.143        |
| ARS-BFGL-NGS-55374     | 25 | 28795160 | <b>24.40</b> | <b>25.01</b> | <b>0.215</b> | <b>0.185</b> |
| ARS-BFGL-NGS-2464      | 26 | 18709176 | <b>20.40</b> | 10.13        | <b>0.098</b> | 0.097        |
| ARS-BFGL-NGS-71584     | 26 | 18863914 | 28.46        | <b>15.95</b> | 0.091        | <b>0.102</b> |
| ARS-BFGL-NGS-113339    | 26 | 19918015 | <b>16.35</b> | 7.34         | <b>0.105</b> | 0.083        |
| BTA-62184-no-rs        | 26 | 20014035 | <b>17.65</b> | 9.58         | <b>0.118</b> | 0.099        |
| BTA-60778-no-rs        | 26 | 20090833 | <b>21.14</b> | <b>14.75</b> | <b>0.127</b> | <b>0.117</b> |
| BTB-00932332           | 26 | 22551770 | 15.48        | <b>11.32</b> | 0.101        | <b>0.130</b> |
| ARS-BFGL-NGS-107403    | 26 | 23470277 | 18.11        | <b>12.42</b> | 0.098        | <b>0.122</b> |
| Hapmap28763-BTA-162328 | 26 | 26472420 | 12.31        | <b>12.37</b> | 0.085        | <b>0.109</b> |
| BTB-01622498           | 28 | 1436040  | 3.42         | <b>12.49</b> | 0.100        | <b>0.158</b> |
| ARS-BFGL-NGS-119076    | 28 | 15361777 | <b>12.02</b> | 8.12         | <b>0.126</b> | 0.086        |
| ARS-BFGL-NGS-43501     | 28 | 17344828 | 14.42        | <b>17.58</b> | 0.083        | <b>0.136</b> |
| ARS-BFGL-NGS-118693    | 28 | 17493199 | 10.68        | <b>13.14</b> | 0.139        | <b>0.127</b> |

#### Fat yield

|                       |   |          |              |       |              |       |
|-----------------------|---|----------|--------------|-------|--------------|-------|
| Hapmap38956-BTA-43309 | 1 | 98853038 | <b>12.91</b> | 10.82 | <b>0.101</b> | 0.114 |
|-----------------------|---|----------|--------------|-------|--------------|-------|

|                                |   |           |              |              |              |              |
|--------------------------------|---|-----------|--------------|--------------|--------------|--------------|
| BTB-01562245                   | 1 | 113644592 | <b>11.25</b> | <b>11.71</b> | <b>0.149</b> | <b>0.175</b> |
| BTA-104132-no-rs               | 1 | 113669783 | <b>11.95</b> | <b>12.23</b> | <b>0.151</b> | <b>0.178</b> |
| ARS-BFGL-BAC-7205              | 1 | 120983738 | <b>12.64</b> | 12.33        | <b>0.079</b> | 0.072        |
| ARS-BFGL-NGS-88388             | 2 | 13718482  | <b>19.97</b> | <b>18.86</b> | <b>0.076</b> | <b>0.081</b> |
| ARS-BFGL-NGS-112315            | 2 | 40959609  | <b>12.86</b> | 5.12         | <b>0.093</b> | 0.091        |
| ARS-BFGL-NGS-44416             | 2 | 48557519  | <b>11.31</b> | 9.45         | <b>0.089</b> | 0.082        |
| ARS-BFGL-NGS-8503              | 2 | 87880854  | <b>11.07</b> | <b>11.84</b> | <b>0.117</b> | <b>0.095</b> |
| BTB-00108243                   | 2 | 112019423 | <b>17.65</b> | <b>21.62</b> | <b>0.137</b> | <b>0.164</b> |
| BTB-01678000                   | 3 | 6985014   | <b>20.43</b> | 20.37        | <b>0.077</b> | 0.068        |
| BTB-01678060                   | 3 | 7009487   | <b>20.08</b> | <b>21.54</b> | <b>0.092</b> | <b>0.091</b> |
| ARS-BFGL-NGS-5956              | 3 | 8558755   | <b>18.73</b> | <b>14.50</b> | <b>0.092</b> | <b>0.093</b> |
| ARS-BFGL-NGS-112616            | 3 | 8598511   | <b>17.12</b> | <b>12.48</b> | <b>0.085</b> | <b>0.085</b> |
| ARS-BFGL-NGS-102139            | 3 | 24018818  | 9.79         | <b>11.56</b> | 0.067        | <b>0.078</b> |
| Hapmap50814-BTA-89905          | 3 | 41486200  | <b>11.97</b> | 9.50         | <b>0.095</b> | 0.079        |
| BTB-01851577                   | 3 | 50093239  | <b>11.69</b> | 6.77         | <b>0.089</b> | 0.072        |
| INRA-648                       | 3 | 54347354  | 13.39        | <b>11.31</b> | 0.147        | <b>0.168</b> |
| Hapmap43441-BTA-103289         | 3 | 61621627  | 17.59        | <b>20.74</b> | 0.068        | <b>0.083</b> |
| BTA-68164-no-rs                | 3 | 68215262  | <b>13.11</b> | 8.02         | <b>0.095</b> | 0.062        |
| BTB-00131847                   | 3 | 68241075  | <b>13.16</b> | 8.09         | <b>0.097</b> | 0.066        |
| BTA-54952-no-rs                | 4 | 11830564  | <b>11.96</b> | 9.08         | <b>0.089</b> | 0.090        |
| ARS-BFGL-NGS-20815             | 4 | 15021946  | <b>15.91</b> | 14.68        | <b>0.083</b> | 0.076        |
| ARS-BFGL-NGS-117196            | 4 | 53206872  | 9.84         | <b>12.44</b> | 0.073        | <b>0.085</b> |
| ARS-BFGL-NGS-110647            | 4 | 77565085  | 9.95         | <b>12.41</b> | 0.081        | <b>0.093</b> |
| Hapmap39895-BTA-15668          | 5 | 15392995  | <b>11.42</b> | 7.32         | <b>0.093</b> | 0.081        |
| ARS-BFGL-NGS-108617            | 5 | 98082173  | <b>15.12</b> | <b>11.57</b> | <b>0.107</b> | <b>0.110</b> |
| ARS-BFGL-NGS-95906             | 5 | 100351926 | <b>20.33</b> | <b>17.38</b> | <b>0.090</b> | <b>0.091</b> |
| Hapmap53294-rs29016908         | 5 | 101090418 | <b>40.43</b> | <b>22.97</b> | <b>0.086</b> | <b>0.095</b> |
| Hapmap60021-ss46526426         | 5 | 101979581 | <b>21.19</b> | <b>13.64</b> | <b>0.095</b> | <b>0.088</b> |
| BTB-00270281                   | 6 | 95770023  | <b>16.38</b> | 12.12        | <b>0.095</b> | 0.073        |
| Hapmap58150-rs29020620         | 6 | 96724594  | <b>11.78</b> | 8.53         | <b>0.076</b> | 0.070        |
| BTB-01700063                   | 6 | 99086447  | <b>21.66</b> | <b>16.75</b> | <b>0.114</b> | <b>0.102</b> |
| Hapmap53916-rs29021982         | 6 | 99581269  | <b>18.46</b> | <b>15.67</b> | <b>0.094</b> | <b>0.094</b> |
| Hapmap48078-BTA-77495          | 6 | 99827767  | <b>13.22</b> | <b>14.54</b> | <b>0.076</b> | <b>0.079</b> |
| ARS-BFGL-NGS-14880             | 7 | 53879989  | <b>14.95</b> | <b>17.58</b> | <b>0.115</b> | <b>0.104</b> |
| ARS-BFGL-NGS-113181            | 7 | 62800839  | <b>17.55</b> | <b>20.39</b> | <b>0.077</b> | <b>0.080</b> |
| BTB-02035459                   | 7 | 63196194  | <b>11.52</b> | 8.67         | <b>0.073</b> | 0.073        |
| BTB-01219396                   | 7 | 63221359  | <b>11.52</b> | 8.67         | <b>0.073</b> | 0.073        |
| ARS-BFGL-NGS-113819            | 7 | 63609102  | 12.18        | <b>13.22</b> | 0.071        | <b>0.081</b> |
| ARS-BFGL-NGS-109819            | 7 | 63664393  | 12.02        | <b>12.76</b> | 0.073        | <b>0.083</b> |
| BTA-12616-no-rs                | 7 | 64712171  | <b>12.81</b> | 8.91         | <b>0.074</b> | 0.063        |
| ARS-BFGL-NGS-65419             | 7 | 66102696  | <b>15.93</b> | <b>13.18</b> | <b>0.092</b> | <b>0.094</b> |
| ARS-BFGL-NGS-12863             | 7 | 68960712  | <b>16.23</b> | 7.43         | <b>0.105</b> | 0.092        |
| ARS-BFGL-NGS-23091             | 7 | 69342623  | <b>13.06</b> | 6.26         | <b>0.110</b> | 0.095        |
| BTB-01222854                   | 7 | 74587278  | <b>13.21</b> | <b>11.20</b> | <b>0.105</b> | <b>0.104</b> |
| BTB-01321253                   | 7 | 83625073  | <b>19.55</b> | <b>20.56</b> | <b>0.083</b> | <b>0.077</b> |
| Hapmap44053-BTA-28733          | 8 | 6369477   | <b>15.07</b> | <b>12.22</b> | <b>0.096</b> | <b>0.113</b> |
| BTA-102639-no-rs               | 8 | 29764842  | 7.33         | <b>11.04</b> | 0.083        | <b>0.105</b> |
| ARS-BFGL-NGS-68597             | 8 | 32188298  | 9.59         | <b>12.15</b> | 0.144        | <b>0.139</b> |
| BTB-01184997                   | 8 | 36171902  | <b>11.48</b> | 10.62        | <b>0.097</b> | 0.092        |
| Hapmap31805-BTA-154485         | 8 | 36232703  | <b>12.95</b> | <b>13.66</b> | <b>0.078</b> | <b>0.084</b> |
| Hapmap41758-BTA-116042         | 8 | 37197678  | <b>11.23</b> | 7.67         | <b>0.105</b> | 0.105        |
| BTB-00384442                   | 9 | 22407445  | <b>11.25</b> | 8.57         | <b>0.094</b> | 0.079        |
| BTA-83317-no-rs                | 9 | 40393986  | <b>18.16</b> | 16.64        | <b>0.087</b> | 0.077        |
| BTA-83528-no-rs                | 9 | 41691114  | <b>17.66</b> | 15.90        | <b>0.132</b> | 0.115        |
| Hapmap34441-BES9_Contig154_536 | 9 | 73154820  | <b>11.99</b> | 10.47        | <b>0.084</b> | 0.091        |
| UA-IFASA-2589                  | 9 | 82175488  | 9.65         | <b>11.75</b> | 0.072        | <b>0.086</b> |

|                        |    |          |               |               |              |              |
|------------------------|----|----------|---------------|---------------|--------------|--------------|
| Hapmap30370-BTA-99862  | 11 | 14499391 | <b>14.20</b>  | 8.56          | <b>0.104</b> | 0.100        |
| Hapmap29758-BTC-003619 | 14 | 5261     | <b>39.73</b>  | <b>33.19</b>  | <b>0.112</b> | <b>0.109</b> |
| Hapmap30381-BTC-005750 | 14 | 50873    | <b>59.46</b>  | <b>54.84</b>  | <b>0.129</b> | <b>0.129</b> |
| Hapmap30383-BTC-005848 | 14 | 76704    | <b>65.31</b>  | <b>55.73</b>  | <b>0.132</b> | <b>0.132</b> |
| BTA-34956-no-rs        | 14 | 101474   | <b>29.89</b>  | <b>29.89</b>  | <b>0.106</b> | <b>0.104</b> |
| ARS-BFGL-NGS-57820     | 14 | 236533   | <b>147.55</b> | <b>121.82</b> | <b>0.194</b> | <b>0.195</b> |
| ARS-BFGL-NGS-34135     | 14 | 260342   | <b>79.17</b>  | <b>71.47</b>  | <b>0.146</b> | <b>0.144</b> |
| ARS-BFGL-NGS-94706     | 14 | 281534   | <b>75.70</b>  | <b>68.83</b>  | <b>0.143</b> | <b>0.141</b> |
| ARS-BFGL-NGS-4939      | 14 | 443936   | <b>159.02</b> | <b>132.41</b> | <b>0.206</b> | <b>0.208</b> |
| ARS-BFGL-NGS-71749     | 14 | 596340   | <b>41.77</b>  | <b>36.70</b>  | <b>0.144</b> | <b>0.147</b> |
| ARS-BFGL-NGS-107379    | 14 | 679601   | <b>101.31</b> | <b>78.31</b>  | <b>0.163</b> | <b>0.160</b> |
| ARS-BFGL-NGS-18365     | 14 | 741868   | <b>46.48</b>  | <b>33.09</b>  | <b>0.084</b> | <b>0.094</b> |
| Hapmap30922-BTC-002021 | 14 | 763332   | <b>49.05</b>  | <b>35.93</b>  | <b>0.087</b> | <b>0.101</b> |
| Hapmap25384-BTC-001997 | 14 | 835055   | <b>63.54</b>  | <b>55.55</b>  | <b>0.103</b> | <b>0.119</b> |
| Hapmap24715-BTC-001973 | 14 | 856890   | <b>60.80</b>  | <b>54.16</b>  | <b>0.105</b> | <b>0.120</b> |
| BTA-35941-no-rs        | 14 | 894253   | <b>97.39</b>  | <b>78.45</b>  | <b>0.155</b> | <b>0.156</b> |
| ARS-BFGL-NGS-101653    | 14 | 931163   | <b>41.64</b>  | <b>36.14</b>  | <b>0.133</b> | <b>0.144</b> |
| ARS-BFGL-NGS-26520     | 14 | 996983   | <b>69.35</b>  | <b>59.88</b>  | <b>0.149</b> | <b>0.159</b> |
| UA-IFASA-6878          | 14 | 1044040  | <b>36.43</b>  | 26.64         | <b>0.074</b> | 0.071        |
| ARS-BFGL-NGS-22866     | 14 | 1131951  | <b>44.94</b>  | <b>42.65</b>  | <b>0.126</b> | <b>0.119</b> |
| ARS-BFGL-NGS-103064    | 14 | 1193335  | <b>61.80</b>  | <b>58.85</b>  | <b>0.110</b> | <b>0.138</b> |
| ARS-BFGL-NGS-3122      | 14 | 1264232  | <b>33.56</b>  | <b>31.89</b>  | <b>0.092</b> | <b>0.126</b> |
| Hapmap25486-BTC-072553 | 14 | 1285036  | <b>34.57</b>  | <b>35.23</b>  | <b>0.108</b> | <b>0.121</b> |
| Hapmap30646-BTC-002054 | 14 | 1461084  | <b>68.94</b>  | <b>51.83</b>  | <b>0.142</b> | <b>0.142</b> |
| Hapmap30086-BTC-002066 | 14 | 1490177  | <b>110.60</b> | <b>85.69</b>  | <b>0.147</b> | <b>0.152</b> |
| Hapmap30374-BTC-002159 | 14 | 1546590  | <b>89.52</b>  | <b>73.07</b>  | <b>0.153</b> | <b>0.154</b> |
| ARS-BFGL-NGS-74378     | 14 | 1889209  | <b>48.29</b>  | <b>35.14</b>  | <b>0.099</b> | <b>0.107</b> |
| ARS-BFGL-NGS-117542    | 14 | 1913107  | <b>28.30</b>  | <b>24.11</b>  | <b>0.103</b> | <b>0.105</b> |
| UA-IFASA-9288          | 14 | 2201869  | <b>48.59</b>  | <b>32.70</b>  | <b>0.089</b> | <b>0.103</b> |
| Hapmap24777-BTC-064977 | 14 | 2261622  | <b>14.06</b>  | <b>12.67</b>  | <b>0.079</b> | <b>0.095</b> |
| Hapmap32970-BTC-064990 | 14 | 2288509  | <b>31.99</b>  | <b>24.55</b>  | <b>0.080</b> | <b>0.095</b> |
| Hapmap24986-BTC-065021 | 14 | 2313594  | <b>31.99</b>  | <b>24.55</b>  | <b>0.080</b> | <b>0.095</b> |
| ARS-BFGL-NGS-22111     | 14 | 2347218  | 19.48         | <b>18.07</b>  | 0.059        | <b>0.079</b> |
| UA-IFASA-7269          | 14 | 2370255  | 19.48         | <b>18.07</b>  | 0.059        | <b>0.079</b> |
| Hapmap26072-BTC-065132 | 14 | 2391825  | 24.28         | <b>24.38</b>  | 0.070        | <b>0.087</b> |
| ARS-BFGL-NGS-113575    | 14 | 2484498  | <b>35.10</b>  | <b>30.78</b>  | <b>0.085</b> | <b>0.097</b> |
| ARS-BFGL-NGS-118081    | 14 | 2511264  | <b>41.29</b>  | <b>37.93</b>  | <b>0.113</b> | <b>0.116</b> |
| ARS-BFGL-NGS-56327     | 14 | 2580413  | <b>60.32</b>  | <b>50.89</b>  | <b>0.105</b> | <b>0.116</b> |
| ARS-BFGL-NGS-100480    | 14 | 2607582  | <b>75.52</b>  | <b>63.36</b>  | <b>0.121</b> | <b>0.128</b> |
| UA-IFASA-5306          | 14 | 2711614  | <b>48.24</b>  | <b>32.60</b>  | <b>0.099</b> | <b>0.110</b> |
| Hapmap27703-BTC-053907 | 14 | 2826072  | 27.55         | <b>23.02</b>  | 0.063        | <b>0.081</b> |
| Hapmap22692-BTC-068210 | 14 | 3018725  | <b>36.91</b>  | <b>23.96</b>  | <b>0.080</b> | <b>0.086</b> |
| Hapmap23302-BTC-052123 | 14 | 3099634  | <b>36.05</b>  | <b>20.28</b>  | <b>0.090</b> | <b>0.096</b> |
| UA-IFASA-6329          | 14 | 3465238  | <b>25.41</b>  | <b>16.40</b>  | <b>0.094</b> | <b>0.083</b> |
| ARS-BFGL-NGS-3571      | 14 | 3587017  | <b>26.21</b>  | <b>18.53</b>  | <b>0.099</b> | <b>0.101</b> |
| ARS-BFGL-NGS-110563    | 14 | 3799229  | <b>25.68</b>  | <b>15.99</b>  | <b>0.103</b> | <b>0.105</b> |
| Hapmap32262-BTC-066621 | 14 | 3834070  | <b>13.39</b>  | 8.84          | <b>0.087</b> | 0.083        |
| ARS-BFGL-NGS-115947    | 14 | 3865963  | <b>34.05</b>  | <b>19.86</b>  | <b>0.107</b> | <b>0.109</b> |
| Hapmap30988-BTC-056315 | 14 | 4693900  | <b>20.44</b>  | <b>15.88</b>  | <b>0.097</b> | <b>0.091</b> |
| ARS-BFGL-NGS-110894    | 14 | 5282437  | <b>15.13</b>  | 7.87          | <b>0.094</b> | 0.101        |
| UA-IFASA-6647          | 14 | 5808643  | <b>21.59</b>  | 12.18         | <b>0.072</b> | 0.073        |
| ARS-BFGL-NGS-102953    | 14 | 5867265  | <b>19.06</b>  | 9.11          | <b>0.076</b> | 0.078        |
| ARS-BFGL-NGS-37911     | 14 | 14274020 | <b>11.29</b>  | 9.61          | <b>0.090</b> | 0.096        |
| ARS-BFGL-NGS-16622     | 15 | 64781292 | <b>11.71</b>  | 9.29          | <b>0.089</b> | 0.085        |
| BTA-37324-no-rs        | 15 | 64802082 | <b>10.94</b>  | 8.43          | <b>0.091</b> | 0.083        |
| Hapmap54310-rs29012181 | 16 | 8166691  | 9.72          | <b>12.29</b>  | 0.093        | <b>0.092</b> |

|                                  |    |          |              |              |              |              |
|----------------------------------|----|----------|--------------|--------------|--------------|--------------|
| Hapmap43402-BTA-91283            | 16 | 8249735  | 8.15         | <b>11.65</b> | 0.086        | <b>0.088</b> |
| ARS-BFGL-NGS-56645               | 16 | 23920210 | <b>11.80</b> | 8.21         | <b>0.082</b> | 0.073        |
| ARS-BFGL-NGS-26559               | 16 | 33367687 | <b>11.77</b> | 10.10        | <b>0.089</b> | 0.094        |
| ARS-BFGL-NGS-93660               | 16 | 77541689 | <b>12.02</b> | 12.76        | <b>0.088</b> | 0.073        |
| ARS-BFGL-NGS-18128               | 17 | 22770146 | <b>11.24</b> | 8.71         | <b>0.096</b> | 0.100        |
| ARS-BFGL-NGS-91287               | 18 | 10052638 | <b>17.13</b> | <b>20.25</b> | <b>0.117</b> | <b>0.101</b> |
| ARS-BFGL-NGS-111247              | 19 | 43146804 | <b>14.32</b> | 15.09        | <b>0.075</b> | 0.072        |
| ARS-BFGL-NGS-24479               | 19 | 45901285 | <b>11.09</b> | 9.17         | <b>0.092</b> | 0.087        |
| ARS-BFGL-NGS-113693              | 19 | 45926259 | <b>12.27</b> | 10.29        | <b>0.092</b> | 0.087        |
| BTB-00783355                     | 20 | 43550938 | 10.23        | <b>16.06</b> | 0.087        | <b>0.111</b> |
| Hapmap48608-BTA-111028           | 20 | 52535573 | 12.29        | <b>16.19</b> | 0.076        | <b>0.088</b> |
| BTA-12959-no-rs                  | 21 | 10922512 | <b>12.61</b> | 11.88        | <b>0.074</b> | 0.071        |
| ARS-BFGL-NGS-101900              | 21 | 30314497 | <b>12.99</b> | 6.17         | <b>0.073</b> | 0.066        |
| ARS-BFGL-NGS-39397               | 26 | 21166268 | <b>12.98</b> | 10.82        | <b>0.078</b> | 0.081        |
| Hapmap46411-BTA-15820            | 26 | 21404446 | <b>14.10</b> | <b>12.01</b> | <b>0.094</b> | <b>0.103</b> |
| Hapmap31825-BTA-158647           | 26 | 21476707 | <b>15.45</b> | <b>11.71</b> | <b>0.073</b> | <b>0.079</b> |
| ARS-BFGL-NGS-110077              | 26 | 21729361 | <b>13.86</b> | <b>14.13</b> | <b>0.086</b> | <b>0.086</b> |
| ARS-BFGL-NGS-18603               | 26 | 21853286 | 21.66        | <b>22.77</b> | 0.067        | <b>0.078</b> |
| ARS-BFGL-NGS-116481              | 26 | 22411701 | <b>22.81</b> | <b>22.25</b> | <b>0.077</b> | <b>0.079</b> |
| Hapmap24832-BTA-138805           | 26 | 22449570 | <b>23.72</b> | <b>23.06</b> | <b>0.077</b> | <b>0.079</b> |
| ARS-BFGL-NGS-6259                | 26 | 22492302 | <b>21.27</b> | <b>20.72</b> | <b>0.077</b> | <b>0.079</b> |
| BTB-00932332                     | 26 | 22551770 | 22.91        | <b>21.24</b> | 0.073        | <b>0.084</b> |
| ARS-BFGL-NGS-1092                | 26 | 24837303 | <b>17.02</b> | <b>19.39</b> | <b>0.096</b> | <b>0.093</b> |
| UA-IFASA-4715                    | 26 | 25330026 | 16.24        | <b>20.09</b> | 0.063        | <b>0.081</b> |
| ARS-BFGL-NGS-38386               | 26 | 32836475 | 7.14         | <b>11.37</b> | 0.065        | <b>0.103</b> |
| ARS-BFGL-NGS-105944              | 26 | 34196569 | <b>11.04</b> | <b>11.12</b> | <b>0.106</b> | <b>0.109</b> |
| ARS-BFGL-NGS-53731               | 26 | 37801879 | 13.09        | <b>15.19</b> | 0.062        | <b>0.087</b> |
| ARS-USMARC-Parent-EF034086-no-rs | 26 | 38309860 | 16.12        | <b>17.87</b> | 0.054        | <b>0.075</b> |
| Hapmap35000-BES9_Contig272_944   | 26 | 38309861 | 16.12        | <b>17.87</b> | 0.054        | <b>0.075</b> |
| ARS-BFGL-NGS-60822               | 28 | 17252660 | 16.04        | <b>12.16</b> | 0.066        | <b>0.079</b> |
| UA-IFASA-6208                    | 28 | 27379038 | <b>12.33</b> | 8.31         | <b>0.081</b> | 0.081        |

#### Milk yield

|                        |   |           |              |              |              |              |
|------------------------|---|-----------|--------------|--------------|--------------|--------------|
| ARS-BFGL-NGS-23720     | 1 | 38486179  | 4.91         | <b>10.88</b> | 0.146        | <b>0.130</b> |
| ARS-BFGL-BAC-13578     | 1 | 121811393 | <b>13.51</b> | <b>11.19</b> | <b>0.189</b> | <b>0.179</b> |
| ARS-BFGL-NGS-86079     | 2 | 19126180  | <b>14.12</b> | 9.49         | <b>0.194</b> | 0.182        |
| Hapmap53232-rs29020795 | 2 | 19202356  | <b>12.91</b> | <b>11.87</b> | <b>0.170</b> | <b>0.161</b> |
| Hapmap60669-rs29018484 | 2 | 20687353  | <b>13.93</b> | 12.24        | <b>0.324</b> | 0.249        |
| ARS-BFGL-NGS-23786     | 2 | 22727721  | <b>12.86</b> | 8.56         | <b>0.170</b> | 0.132        |
| UA-IFASA-4555          | 2 | 103573252 | <b>10.91</b> | 7.81         | <b>0.347</b> | 0.267        |
| ARS-BFGL-NGS-119065    | 3 | 56970477  | 8.93         | <b>12.42</b> | 0.280        | <b>0.256</b> |
| ARS-BFGL-NGS-75548     | 4 | 78246158  | <b>15.43</b> | <b>11.18</b> | <b>0.446</b> | <b>0.338</b> |
| BTA-74090-no-rs        | 5 | 7569039   | 9.55         | <b>12.21</b> | 0.178        | <b>0.147</b> |
| Hapmap33079-BTA-163567 | 6 | 1936      | <b>13.03</b> | 9.90         | <b>0.175</b> | 0.098        |
| ARS-BFGL-NGS-117147    | 6 | 31235325  | <b>10.90</b> | 3.52         | <b>0.199</b> | 0.135        |
| BTA-75680-no-rs        | 6 | 31470687  | <b>11.66</b> | 6.98         | <b>0.157</b> | 0.102        |
| Hapmap54442-rs29025673 | 6 | 31579806  | <b>12.51</b> | 8.27         | <b>0.157</b> | 0.102        |
| Hapmap31819-BTA-156590 | 6 | 40421547  | 10.20        | <b>11.60</b> | 0.165        | <b>0.124</b> |
| UA-IFASA-2111          | 6 | 85289127  | <b>14.59</b> | 15.14        | <b>0.192</b> | 0.122        |
| Hapmap25708-BTC-043671 | 6 | 88263655  | <b>11.16</b> | 11.06        | <b>0.213</b> | 0.111        |
| Hapmap40845-BTA-97263  | 6 | 92788189  | <b>11.94</b> | 7.87         | <b>0.196</b> | 0.143        |
| BTB-01428914           | 6 | 93850918  | <b>12.79</b> | 8.07         | <b>0.157</b> | 0.098        |
| BTB-00281303           | 6 | 111612203 | <b>10.87</b> | 3.17         | <b>0.209</b> | 0.093        |
| Hapmap53417-rs29014877 | 7 | 106039868 | <b>13.08</b> | 11.74        | <b>0.164</b> | 0.114        |
| ARS-BFGL-NGS-4062      | 8 | 5505897   | 6.84         | <b>11.25</b> | 0.199        | <b>0.183</b> |
| Hapmap44053-BTA-28733  | 8 | 6369477   | 13.69        | <b>11.43</b> | 0.151        | <b>0.166</b> |

|                        |    |           |               |               |              |              |
|------------------------|----|-----------|---------------|---------------|--------------|--------------|
| BTA-82314-no-rs        | 8  | 97201103  | 9.03          | <b>15.81</b>  | 0.162        | <b>0.172</b> |
| ARS-BFGL-NGS-52530     | 9  | 44230587  | <b>12.72</b>  | 10.89         | <b>0.273</b> | 0.192        |
| Hapmap49359-BTA-88301  | 9  | 45435722  | 8.60          | <b>11.76</b>  | 0.147        | <b>0.149</b> |
| ARS-BFGL-NGS-75844     | 9  | 45497534  | 7.87          | <b>11.04</b>  | 0.133        | <b>0.150</b> |
| ARS-BFGL-NGS-39444     | 9  | 45590254  | 7.87          | <b>11.04</b>  | 0.133        | <b>0.150</b> |
| BTA-10828-no-rs        | 9  | 46600974  | <b>15.86</b>  | <b>18.25</b>  | <b>0.160</b> | <b>0.150</b> |
| ARS-BFGL-NGS-25071     | 9  | 75512134  | 9.95          | <b>13.07</b>  | 0.083        | <b>0.137</b> |
| ARS-BFGL-NGS-62628     | 9  | 82136926  | 10.06         | <b>11.58</b>  | 0.149        | <b>0.133</b> |
| ARS-BFGL-NGS-105675    | 11 | 104891662 | 11.47         | <b>14.14</b>  | 0.145        | <b>0.156</b> |
| ARS-BFGL-NGS-78549     | 11 | 106534689 | <b>12.38</b>  | <b>14.06</b>  | <b>0.234</b> | <b>0.220</b> |
| ARS-BFGL-NGS-56157     | 13 | 63208626  | <b>13.95</b>  | 5.96          | <b>0.163</b> | 0.088        |
| Hapmap54034-rs29026486 | 13 | 65183781  | <b>14.87</b>  | 4.39          | <b>0.188</b> | 0.090        |
| ARS-BFGL-NGS-103635    | 13 | 67816926  | <b>13.47</b>  | 4.35          | <b>0.157</b> | 0.081        |
| Hapmap44949-BTA-33430  | 13 | 67920496  | <b>11.12</b>  | 5.80          | <b>0.209</b> | 0.119        |
| Hapmap29758-BTC-003619 | 14 | 5261      | <b>41.37</b>  | <b>45.38</b>  | <b>0.175</b> | <b>0.156</b> |
| Hapmap30381-BTC-005750 | 14 | 50873     | <b>46.72</b>  | <b>39.87</b>  | <b>0.280</b> | <b>0.254</b> |
| Hapmap30383-BTC-005848 | 14 | 76704     | <b>130.39</b> | <b>113.46</b> | <b>0.373</b> | <b>0.292</b> |
| BTA-34956-no-rs        | 14 | 101474    | <b>69.39</b>  | <b>51.08</b>  | <b>0.287</b> | <b>0.246</b> |
| ARS-BFGL-NGS-57820     | 14 | 236533    | <b>218.33</b> | <b>207.08</b> | <b>0.478</b> | <b>0.372</b> |
| ARS-BFGL-NGS-34135     | 14 | 260342    | <b>111.86</b> | <b>96.34</b>  | <b>0.305</b> | <b>0.261</b> |
| ARS-BFGL-NGS-94706     | 14 | 281534    | <b>109.45</b> | <b>91.11</b>  | <b>0.311</b> | <b>0.259</b> |
| ARS-BFGL-NGS-4939      | 14 | 443936    | <b>226.90</b> | <b>210.30</b> | <b>0.477</b> | <b>0.371</b> |
| ARS-BFGL-NGS-71749     | 14 | 596340    | <b>32.17</b>  | 24.98         | <b>0.205</b> | 0.153        |
| ARS-BFGL-NGS-107379    | 14 | 679601    | <b>165.98</b> | <b>159.61</b> | <b>0.387</b> | <b>0.310</b> |
| ARS-BFGL-NGS-18365     | 14 | 741868    | <b>36.88</b>  | 44.68         | <b>0.202</b> | 0.115        |
| Hapmap30922-BTC-002021 | 14 | 763332    | <b>27.70</b>  | 33.83         | <b>0.187</b> | 0.111        |
| Hapmap25384-BTC-001997 | 14 | 835055    | <b>86.29</b>  | <b>71.08</b>  | <b>0.294</b> | <b>0.201</b> |
| Hapmap24715-BTC-001973 | 14 | 856890    | <b>76.90</b>  | <b>63.03</b>  | <b>0.290</b> | <b>0.203</b> |
| BTA-35941-no-rs        | 14 | 894253    | <b>81.51</b>  | <b>91.67</b>  | <b>0.245</b> | <b>0.196</b> |
| ARS-BFGL-NGS-101653    | 14 | 931163    | <b>48.62</b>  | <b>43.61</b>  | <b>0.228</b> | <b>0.173</b> |
| ARS-BFGL-NGS-26520     | 14 | 996983    | <b>55.92</b>  | <b>51.37</b>  | <b>0.211</b> | <b>0.151</b> |
| UA-IFASA-6878          | 14 | 1044040   | <b>82.94</b>  | <b>84.88</b>  | <b>0.254</b> | <b>0.200</b> |
| ARS-BFGL-NGS-22866     | 14 | 1131951   | <b>53.32</b>  | <b>49.99</b>  | <b>0.190</b> | <b>0.190</b> |
| ARS-BFGL-NGS-103064    | 14 | 1193335   | <b>78.12</b>  | <b>56.27</b>  | <b>0.288</b> | <b>0.196</b> |
| ARS-BFGL-NGS-3122      | 14 | 1264232   | <b>56.10</b>  | <b>39.10</b>  | <b>0.262</b> | <b>0.155</b> |
| Hapmap25486-BTC-072553 | 14 | 1285036   | <b>54.16</b>  | <b>34.14</b>  | <b>0.269</b> | <b>0.185</b> |
| Hapmap30646-BTC-002054 | 14 | 1461084   | <b>61.98</b>  | <b>70.96</b>  | <b>0.216</b> | <b>0.177</b> |
| Hapmap30086-BTC-002066 | 14 | 1490177   | <b>77.59</b>  | <b>89.06</b>  | <b>0.244</b> | <b>0.198</b> |
| Hapmap30374-BTC-002159 | 14 | 1546590   | <b>84.37</b>  | <b>91.65</b>  | <b>0.236</b> | <b>0.193</b> |
| ARS-BFGL-NGS-74378     | 14 | 1889209   | <b>51.60</b>  | <b>62.95</b>  | <b>0.264</b> | <b>0.209</b> |
| ARS-BFGL-NGS-117542    | 14 | 1913107   | <b>37.52</b>  | <b>38.66</b>  | <b>0.239</b> | <b>0.201</b> |
| UA-IFASA-9288          | 14 | 2201869   | <b>34.84</b>  | <b>42.80</b>  | <b>0.209</b> | <b>0.147</b> |
| Hapmap32970-BTC-064990 | 14 | 2288509   | <b>19.04</b>  | 19.18         | <b>0.165</b> | 0.102        |
| Hapmap24986-BTC-065021 | 14 | 2313594   | <b>19.04</b>  | 19.18         | <b>0.165</b> | 0.102        |
| Hapmap26072-BTC-065132 | 14 | 2391825   | <b>37.91</b>  | <b>27.05</b>  | <b>0.221</b> | <b>0.173</b> |
| Hapmap26527-BTC-005059 | 14 | 2418618   | <b>26.38</b>  | <b>22.86</b>  | <b>0.175</b> | <b>0.140</b> |
| ARS-BFGL-NGS-113575    | 14 | 2484498   | <b>15.20</b>  | <b>18.65</b>  | <b>0.173</b> | <b>0.136</b> |
| ARS-BFGL-NGS-118081    | 14 | 2511264   | <b>27.04</b>  | <b>26.10</b>  | <b>0.189</b> | <b>0.167</b> |
| ARS-BFGL-NGS-56327     | 14 | 2580413   | <b>37.86</b>  | <b>38.51</b>  | <b>0.224</b> | <b>0.179</b> |
| ARS-BFGL-NGS-100480    | 14 | 2607582   | <b>47.61</b>  | <b>45.61</b>  | <b>0.243</b> | <b>0.192</b> |
| ARS-BFGL-NGS-42263     | 14 | 2681399   | <b>23.44</b>  | <b>18.82</b>  | <b>0.197</b> | <b>0.165</b> |
| UA-IFASA-5306          | 14 | 2711614   | <b>36.83</b>  | <b>45.80</b>  | <b>0.223</b> | <b>0.171</b> |
| ARS-BFGL-NGS-54400     | 14 | 2736946   | <b>21.12</b>  | <b>16.78</b>  | <b>0.206</b> | <b>0.163</b> |
| Hapmap22783-BTC-068255 | 14 | 2989274   | <b>25.42</b>  | <b>32.59</b>  | <b>0.207</b> | <b>0.178</b> |
| Hapmap22692-BTC-068210 | 14 | 3018725   | <b>34.59</b>  | <b>45.38</b>  | <b>0.199</b> | <b>0.156</b> |
| Hapmap23302-BTC-052123 | 14 | 3099634   | <b>36.42</b>  | <b>52.77</b>  | <b>0.206</b> | <b>0.161</b> |

|                        |    |          |              |              |              |              |
|------------------------|----|----------|--------------|--------------|--------------|--------------|
| Hapmap25217-BTC-067767 | 14 | 3189311  | <b>35.96</b> | 24.53        | <b>0.189</b> | 0.094        |
| UA-IFASA-6329          | 14 | 3465238  | <b>25.58</b> | <b>29.83</b> | <b>0.166</b> | <b>0.133</b> |
| ARS-BFGL-NGS-56339     | 14 | 3498808  | <b>15.52</b> | <b>20.81</b> | <b>0.160</b> | <b>0.155</b> |
| UA-IFASA-8927          | 14 | 3640095  | <b>18.48</b> | <b>18.50</b> | <b>0.154</b> | <b>0.130</b> |
| Hapmap32262-BTC-066621 | 14 | 3834070  | <b>28.92</b> | <b>27.90</b> | <b>0.193</b> | <b>0.140</b> |
| Hapmap30091-BTC-005211 | 14 | 3940999  | <b>26.82</b> | <b>23.11</b> | <b>0.225</b> | <b>0.149</b> |
| ARS-BFGL-BAC-24839     | 14 | 3993201  | <b>22.12</b> | <b>26.61</b> | <b>0.164</b> | <b>0.137</b> |
| ARS-BFGL-BAC-24804     | 14 | 4157676  | <b>42.02</b> | <b>59.28</b> | <b>0.163</b> | <b>0.136</b> |
| Hapmap51646-BTA-86764  | 14 | 4302230  | <b>33.30</b> | 41.88        | <b>0.186</b> | 0.111        |
| ARS-BFGL-NGS-112858    | 14 | 4956374  | <b>25.89</b> | <b>37.11</b> | <b>0.199</b> | <b>0.155</b> |
| Hapmap51078-BTA-87682  | 14 | 5064062  | <b>15.80</b> | <b>12.92</b> | <b>0.192</b> | <b>0.127</b> |
| ARS-BFGL-NGS-55227     | 14 | 5085415  | <b>19.63</b> | <b>33.44</b> | <b>0.163</b> | <b>0.145</b> |
| Hapmap32236-BTC-049785 | 14 | 5139497  | 19.37        | <b>34.36</b> | 0.142        | <b>0.131</b> |
| ARS-BFGL-BAC-20965     | 14 | 5225005  | <b>23.50</b> | <b>18.29</b> | <b>0.244</b> | <b>0.175</b> |
| Hapmap33635-BTC-049051 | 14 | 5318260  | <b>16.46</b> | 5.75         | <b>0.192</b> | 0.103        |
| Hapmap27091-BTC-048823 | 14 | 5356987  | <b>29.54</b> | 27.13        | <b>0.197</b> | 0.113        |
| Hapmap23851-BTC-048718 | 14 | 5387835  | <b>28.66</b> | <b>24.81</b> | <b>0.236</b> | <b>0.131</b> |
| Hapmap32234-BTC-048199 | 14 | 5640337  | <b>32.52</b> | <b>37.23</b> | <b>0.209</b> | <b>0.148</b> |
| Hapmap26283-BTC-048098 | 14 | 5696728  | 15.08        | <b>30.24</b> | 0.151        | <b>0.128</b> |
| Hapmap32948-BTC-047992 | 14 | 5839289  | <b>22.95</b> | <b>32.42</b> | <b>0.190</b> | <b>0.138</b> |
| Hapmap24756-BTC-047876 | 14 | 5915294  | <b>20.39</b> | <b>19.47</b> | <b>0.215</b> | <b>0.158</b> |
| Hapmap25716-BTC-047850 | 14 | 5937549  | <b>16.11</b> | <b>19.08</b> | <b>0.196</b> | <b>0.139</b> |
| Hapmap23799-BTC-047701 | 14 | 6044245  | <b>11.39</b> | 12.82        | <b>0.212</b> | 0.130        |
| ARS-BFGL-BAC-8730      | 14 | 6252100  | <b>30.95</b> | 21.19        | <b>0.187</b> | 0.118        |
| Hapmap53312-rs29018332 | 14 | 60576872 | <b>20.09</b> | 6.88         | <b>0.159</b> | 0.067        |
| BTA-35525-no-rs        | 14 | 72400486 | 9.43         | <b>11.65</b> | 0.078        | <b>0.154</b> |
| ARS-BFGL-BAC-23729     | 14 | 73127978 | 4.90         | <b>11.73</b> | 0.054        | <b>0.168</b> |
| Hapmap43128-BTA-105550 | 15 | 52541506 | <b>12.54</b> | 7.43         | <b>0.155</b> | 0.084        |
| Hapmap59019-rs29021918 | 18 | 41938135 | 10.02        | <b>16.37</b> | 0.118        | <b>0.157</b> |
| ARS-BFGL-NGS-17557     | 20 | 1290829  | <b>13.98</b> | 11.50        | <b>0.172</b> | 0.127        |
| Hapmap39811-BTA-122745 | 20 | 35432864 | 10.43        | <b>13.05</b> | 0.161        | <b>0.165</b> |
| BTB-01888575           | 20 | 35457272 | 8.48         | <b>11.86</b> | 0.177        | <b>0.185</b> |
| BTA-50244-no-rs        | 20 | 36466784 | 6.63         | <b>12.12</b> | 0.130        | <b>0.167</b> |
| BTA-50402-no-rs        | 20 | 36667999 | 7.94         | <b>15.52</b> | 0.141        | <b>0.179</b> |
| Hapmap26466-BTA-160199 | 20 | 36746234 | 8.57         | <b>13.82</b> | 0.151        | <b>0.185</b> |
| BTA-50386-no-rs        | 20 | 36837402 | 6.13         | <b>13.57</b> | 0.134        | <b>0.154</b> |
| BTA-50376-no-rs        | 20 | 36915967 | <b>15.87</b> | <b>25.25</b> | <b>0.160</b> | <b>0.170</b> |
| Hapmap57531-rs29013890 | 20 | 36955574 | <b>13.12</b> | <b>17.52</b> | <b>0.181</b> | <b>0.170</b> |
| Hapmap54884-rs29017180 | 20 | 50564369 | 8.80         | <b>17.44</b> | 0.174        | <b>0.128</b> |
| ARS-BFGL-NGS-37182     | 22 | 5301596  | <b>10.98</b> | 10.56        | <b>0.267</b> | 0.273        |
| ARS-BFGL-NGS-80066     | 23 | 20578210 | <b>11.18</b> | 7.83         | <b>0.335</b> | 0.200        |
| Hapmap43294-BTA-56514  | 23 | 32759583 | <b>12.29</b> | 8.13         | <b>0.303</b> | 0.165        |
| ARS-BFGL-NGS-55374     | 25 | 28795160 | <b>12.07</b> | 10.48        | <b>0.273</b> | 0.192        |
| BTB-02094179           | 26 | 467952   | 7.37         | <b>10.98</b> | 0.183        | <b>0.196</b> |
| ARS-BFGL-NGS-2127      | 26 | 13563198 | <b>13.90</b> | 8.58         | <b>0.158</b> | 0.115        |
| ARS-BFGL-NGS-2464      | 26 | 18709176 | <b>13.00</b> | 8.73         | <b>0.150</b> | 0.134        |
| ARS-BFGL-NGS-77668     | 26 | 18760372 | 19.50        | <b>16.74</b> | 0.132        | <b>0.131</b> |
| ARS-BFGL-NGS-23064     | 26 | 18788121 | 18.84        | <b>15.64</b> | 0.132        | <b>0.131</b> |
| ARS-BFGL-NGS-71584     | 26 | 18863914 | 19.45        | <b>14.43</b> | 0.113        | <b>0.127</b> |
| BTB-00930720           | 26 | 21323659 | <b>12.27</b> | <b>10.90</b> | <b>0.148</b> | <b>0.151</b> |
| Hapmap31825-BTA-158647 | 26 | 21476707 | <b>14.00</b> | <b>11.18</b> | <b>0.160</b> | <b>0.135</b> |
| BTB-00931481           | 26 | 21631982 | 21.41        | <b>17.08</b> | 0.157        | <b>0.157</b> |
| ARS-BFGL-NGS-18603     | 26 | 21853286 | 13.82        | <b>14.96</b> | 0.138        | <b>0.139</b> |
| BTB-00932332           | 26 | 22551770 | 15.47        | <b>14.23</b> | 0.153        | <b>0.177</b> |
| ARS-BFGL-NGS-107403    | 26 | 23470277 | 18.24        | <b>16.31</b> | 0.165        | <b>0.181</b> |
| ARS-BFGL-NGS-119314    | 26 | 25634039 | 11.67        | <b>14.68</b> | 0.130        | <b>0.148</b> |

|                        |    |          |              |              |              |              |
|------------------------|----|----------|--------------|--------------|--------------|--------------|
| ARS-BFGL-NGS-109460    | 27 | 46280579 | <b>14.33</b> | 3.91         | <b>0.172</b> | 0.101        |
| ARS-BFGL-NGS-116386    | 28 | 18996324 | 7.27         | <b>15.71</b> | 0.189        | <b>0.148</b> |
| BTB-02080610           | 28 | 19938671 | <b>12.70</b> | 9.76         | <b>0.201</b> | 0.151        |
| Hapmap58649-rs29011010 | 28 | 28185115 | <b>15.70</b> | 9.11         | <b>0.154</b> | 0.127        |
| ARS-BFGL-NGS-116154    | 29 | 49020982 | 8.01         | <b>10.91</b> | 0.142        | <b>0.165</b> |

---
