# Supplementary material for: Using Genome-Wide Association Analysis to Characterize Environmental Sensitivity of Milk Traits in Dairy Cattle
Source: PubMed Central journal article supplement (PMC3704237; doi:10.1534/g3.113.006536), 2013-07-01
Supplement: supp_g3.113.006536_TableS2.pdf [file supp_g3.113.006536_TableS2.pdf]

**Table S2 Validated SNPs with chromosome (BTA), position in base pairs (bp), F-values and effects for intercept and slope.** Effect estimates were taken from the validation set. Validated SNPs are indicated in bold type F-values and effect estimates. Results from the analysis of the log-transformed data set.

| SNP name               | BTA | bp        | F-values in discovery dataset |              | Effects (in $\sigma$ ) |               |
|------------------------|-----|-----------|-------------------------------|--------------|------------------------|---------------|
|                        |     |           | Intercept                     | Slope        | Intercept              | Slope         |
| <b>ln(Protein)</b>     |     |           |                               |              |                        |               |
| BTB-00014850           | 1   | 33047886  | 24.41                         | <b>22.24</b> | 0.037                  | <b>0.120</b>  |
| BTA-17929-no-rs        | 1   | 94762863  | 14.03                         | <b>10.87</b> | 0.130                  | <b>0.157</b>  |
| ARS-BFGL-BAC-7205      | 1   | 120983738 | <b>15.50</b>                  | <b>13.42</b> | <b>0.190</b>           | <b>0.124</b>  |
| ARS-BFGL-NGS-99492     | 1   | 121607486 | 16.79                         | <b>14.24</b> | 0.159                  | <b>0.144</b>  |
| BTB-01116994           | 1   | 122957014 | 13.08                         | <b>12.97</b> | 0.130                  | <b>0.171</b>  |
| ARS-BFGL-NGS-5956      | 3   | 8558755   | <b>11.21</b>                  | 6.20         | <b>0.225</b>           | 0.045         |
| Hapmap22861-BTA-141421 | 3   | 60025569  | 10.41                         | <b>12.01</b> | 0.093                  | <b>0.089</b>  |
| Hapmap39895-BTA-15668  | 5   | 15392995  | <b>14.67</b>                  | 12.25        | <b>0.219</b>           | 0.085         |
| ARS-BFGL-NGS-68464     | 5   | 18395406  | <b>12.53</b>                  | 9.43         | <b>0.229</b>           | 0.104         |
| Hapmap23201-BTC-072836 | 6   | 40655229  | 21.27                         | <b>16.53</b> | 0.122                  | <b>0.110</b>  |
| Hapmap58150-rs29020620 | 6   | 96724594  | <b>20.75</b>                  | 7.37         | <b>0.188</b>           | 0.096         |
| BTB-00281303           | 6   | 111612203 | <b>15.31</b>                  | 2.36         | <b>0.206</b>           | 0.104         |
| ARS-BFGL-NGS-14880     | 7   | 53879989  | <b>12.33</b>                  | 17.75        | <b>0.277</b>           | 0.125         |
| ARS-BFGL-NGS-113181    | 7   | 62800839  | <b>12.44</b>                  | <b>10.95</b> | <b>0.186</b>           | <b>0.085</b>  |
| Hapmap44053-BTA-28733  | 8   | 6369477   | <b>16.59</b>                  | <b>14.72</b> | <b>0.232</b>           | <b>0.141</b>  |
| Hapmap31805-BTA-154485 | 8   | 36232703  | <b>11.49</b>                  | 4.12         | <b>0.187</b>           | 0.074         |
| Hapmap57000-rs29011304 | 9   | 26662     | 13.22                         | <b>19.26</b> | 0.112                  | <b>0.109</b>  |
| BTB-00389006           | 9   | 39062436  | 16.14                         | <b>15.30</b> | 0.144                  | <b>0.134</b>  |
| BTA-83317-no-rs        | 9   | 40393986  | <b>26.21</b>                  | <b>19.61</b> | <b>0.212</b>           | <b>0.119</b>  |
| BTA-83528-no-rs        | 9   | 41691114  | <b>25.03</b>                  | 16.16        | <b>0.330</b>           | 0.134         |
| BTA-59878-no-rs        | 9   | 44095822  | 28.62                         | <b>15.86</b> | 0.140                  | <b>0.100</b>  |
| ARS-BFGL-NGS-52530     | 9   | 44230587  | <b>25.18</b>                  | <b>25.13</b> | <b>0.275</b>           | <b>0.224</b>  |
| ARS-BFGL-NGS-103934    | 9   | 44255942  | 17.70                         | <b>18.51</b> | 0.224                  | <b>0.138</b>  |
| BTA-10828-no-rs        | 9   | 46600974  | 24.96                         | <b>21.33</b> | 0.109                  | <b>0.128</b>  |
| Hapmap24524-BTA-107865 | 9   | 47934344  | 10.86                         | <b>17.83</b> | 0.064                  | <b>0.105</b>  |
| ARS-BFGL-NGS-51043     | 9   | 51493578  | 7.19                          | <b>11.78</b> | 0.004                  | <b>0.091</b>  |
| BTB-00391835           | 9   | 52160813  | <b>11.19</b>                  | 5.86         | <b>0.202</b>           | 0.101         |
| ARS-BFGL-NGS-114465    | 9   | 79835130  | 7.21                          | <b>12.68</b> | 0.032                  | <b>0.099</b>  |
| UA-IFASA-2589          | 9   | 82175488  | <b>16.53</b>                  | 14.78        | <b>0.175</b>           | 0.095         |
| ARS-BFGL-NGS-88689     | 11  | 29901111  | 7.51                          | <b>14.05</b> | 0.176                  | <b>0.171</b>  |
| ARS-BFGL-NGS-87426     | 11  | 30070765  | 11.64                         | <b>14.05</b> | 0.140                  | <b>0.143</b>  |
| ARS-BFGL-NGS-21332     | 11  | 30108643  | 8.57                          | <b>14.57</b> | 0.171                  | <b>0.159</b>  |
| ARS-BFGL-NGS-118724    | 11  | 30366110  | 12.31                         | <b>11.69</b> | 0.171                  | <b>0.145</b>  |
| Hapmap45971-BTA-102151 | 11  | 71170530  | 15.89                         | <b>11.36</b> | 0.071                  | <b>0.107</b>  |
| ARS-BFGL-BAC-12483     | 13  | 1310816   | 9.44                          | <b>12.89</b> | 0.185                  | <b>0.138</b>  |
| Hapmap45253-BTA-15908  | 13  | 1498184   | <b>11.23</b>                  | 8.74         | <b>0.250</b>           | 0.159         |
| ARS-BFGL-NGS-63777     | 13  | 67075815  | 21.41                         | <b>16.44</b> | 0.253                  | <b>0.162</b>  |
| ARS-BFGL-NGS-52851     | 13  | 77352863  | 11.80                         | <b>15.82</b> | 0.114                  | <b>0.128</b>  |
| Hapmap29758-BTC-003619 | 14  | 5261      | <b>14.75</b>                  | 11.14        | <b>0.271</b>           | -0.053        |
| Hapmap30383-BTC-005848 | 14  | 76704     | <b>45.90</b>                  | <b>32.63</b> | <b>0.319</b>           | <b>-0.148</b> |
| BTA-34956-no-rs        | 14  | 101474    | <b>21.25</b>                  | 8.68         | <b>0.258</b>           | -0.126        |
| ARS-BFGL-NGS-57820     | 14  | 236533    | <b>72.35</b>                  | <b>54.42</b> | <b>0.470</b>           | <b>-0.162</b> |
| ARS-BFGL-NGS-34135     | 14  | 260342    | <b>33.86</b>                  | 17.84        | <b>0.354</b>           | -0.104        |
| ARS-BFGL-NGS-94706     | 14  | 281534    | <b>32.66</b>                  | 16.59        | <b>0.346</b>           | -0.100        |
| ARS-BFGL-NGS-4939      | 14  | 443936    | <b>76.53</b>                  | <b>54.67</b> | <b>0.497</b>           | <b>-0.157</b> |
| ARS-BFGL-NGS-107379    | 14  | 679601    | <b>61.30</b>                  | <b>51.49</b> | <b>0.391</b>           | <b>-0.136</b> |
| Hapmap25384-BTC-001997 | 14  | 835055    | <b>27.04</b>                  | 14.45        | <b>0.247</b>           | -0.061        |
| Hapmap24715-BTC-001973 | 14  | 856890    | <b>22.96</b>                  | 11.30        | <b>0.253</b>           | -0.064        |
| BTA-35941-no-rs        | 14  | 894253    | <b>25.36</b>                  | 22.23        | <b>0.375</b>           | -0.076        |
| ARS-BFGL-NGS-101653    | 14  | 931163    | <b>20.57</b>                  | 14.60        | <b>0.322</b>           | -0.094        |

|                        |    |          |              |              |              |              |
|------------------------|----|----------|--------------|--------------|--------------|--------------|
| ARS-BFGL-NGS-26520     | 14 | 996983   | <b>20.29</b> | 13.50        | <b>0.361</b> | -0.058       |
| UA-IFASA-6878          | 14 | 1044040  | <b>32.09</b> | 28.23        | <b>0.176</b> | -0.076       |
| ARS-BFGL-NGS-22866     | 14 | 1131951  | <b>20.13</b> | 10.87        | <b>0.307</b> | -0.098       |
| ARS-BFGL-NGS-103064    | 14 | 1193335  | <b>22.91</b> | 7.53         | <b>0.264</b> | -0.050       |
| ARS-BFGL-NGS-3122      | 14 | 1264232  | <b>19.19</b> | 6.75         | <b>0.220</b> | -0.029       |
| Hapmap25486-BTC-072553 | 14 | 1285036  | <b>19.18</b> | 7.04         | <b>0.262</b> | -0.076       |
| Hapmap30646-BTC-002054 | 14 | 1461084  | <b>25.97</b> | <b>27.24</b> | <b>0.346</b> | <b>0.130</b> |
| Hapmap30086-BTC-002066 | 14 | 1490177  | <b>22.30</b> | 21.27        | <b>0.358</b> | -0.091       |
| Hapmap30374-BTC-002159 | 14 | 1546590  | <b>26.64</b> | 21.65        | <b>0.370</b> | -0.073       |
| ARS-BFGL-NGS-74378     | 14 | 1889209  | <b>18.11</b> | 16.86        | <b>0.236</b> | -0.059       |
| ARS-BFGL-NGS-117542    | 14 | 1913107  | <b>16.54</b> | 12.41        | <b>0.249</b> | -0.107       |
| ARS-BFGL-NGS-100480    | 14 | 2607582  | <b>11.61</b> | 6.51         | <b>0.292</b> | -0.033       |
| UA-IFASA-5306          | 14 | 2711614  | <b>11.40</b> | 11.87        | <b>0.236</b> | -0.029       |
| Hapmap22692-BTC-068210 | 14 | 3018725  | <b>12.60</b> | 13.43        | <b>0.193</b> | -0.047       |
| Hapmap23302-BTC-052123 | 14 | 3099634  | <b>14.23</b> | 18.84        | <b>0.215</b> | -0.050       |
| UA-IFASA-6329          | 14 | 3465238  | <b>10.89</b> | 16.37        | <b>0.231</b> | -0.036       |
| ARS-BFGL-NGS-110563    | 14 | 3799229  | <b>12.33</b> | 14.60        | <b>0.250</b> | -0.024       |
| Hapmap32262-BTC-066621 | 14 | 3834070  | <b>14.68</b> | 9.51         | <b>0.213</b> | -0.071       |
| Hapmap32236-BTC-049785 | 14 | 5139497  | 12.66        | <b>20.47</b> | 0.142        | <b>0.111</b> |
| BTB-01988444           | 14 | 56535371 | 3.79         | <b>10.99</b> | 0.077        | <b>0.143</b> |
| ARS-BFGL-NGS-100131    | 15 | 21041772 | 9.65         | <b>10.88</b> | 0.076        | <b>0.145</b> |
| BTB-01698088           | 16 | 9738423  | 11.30        | <b>14.27</b> | 0.156        | <b>0.144</b> |
| ARS-BFGL-NGS-56645     | 16 | 23920210 | <b>15.64</b> | 5.92         | <b>0.199</b> | 0.060        |
| ARS-BFGL-NGS-38023     | 16 | 33318455 | 18.62        | <b>13.72</b> | 0.105        | <b>0.128</b> |
| ARS-BFGL-NGS-26559     | 16 | 33367687 | <b>11.76</b> | 10.47        | <b>0.216</b> | 0.141        |
| ARS-BFGL-NGS-59645     | 16 | 73117625 | <b>16.15</b> | 10.33        | <b>0.235</b> | 0.086        |
| ARS-BFGL-NGS-21141     | 17 | 3125444  | 5.55         | <b>14.51</b> | 0.092        | <b>0.105</b> |
| Hapmap58542-rs29018933 | 17 | 29430592 | 4.76         | <b>12.24</b> | 0.071        | <b>0.087</b> |
| ARS-BFGL-BAC-33672     | 20 | 44108671 | 10.55        | <b>12.67</b> | 0.235        | <b>0.196</b> |
| BTA-17135-no-rs        | 20 | 49557519 | 11.68        | <b>16.41</b> | 0.154        | <b>0.168</b> |
| BTB-01251603           | 20 | 50418473 | 8.95         | <b>11.30</b> | 0.178        | <b>0.214</b> |
| Hapmap54884-rs29017180 | 20 | 50564369 | 4.84         | <b>12.50</b> | 0.059        | <b>0.087</b> |
| ARS-BFGL-BAC-34291     | 20 | 54837742 | 8.44         | <b>14.24</b> | 0.145        | <b>0.177</b> |
| Hapmap53927-rs29025287 | 20 | 56464296 | 8.63         | <b>11.17</b> | 0.152        | <b>0.185</b> |
| ARS-BFGL-BAC-36842     | 20 | 58820614 | 6.52         | <b>11.22</b> | 0.125        | <b>0.151</b> |
| BTA-12959-no-rs        | 21 | 10922512 | <b>13.78</b> | 9.40         | <b>0.178</b> | 0.109        |
| ARS-BFGL-NGS-101900    | 21 | 30314497 | <b>14.16</b> | 5.32         | <b>0.176</b> | 0.104        |
| ARS-BFGL-NGS-110044    | 21 | 30892171 | <b>11.75</b> | 3.37         | <b>0.196</b> | 0.050        |
| ARS-BFGL-NGS-55374     | 25 | 28795160 | <b>24.35</b> | <b>24.33</b> | <b>0.275</b> | <b>0.224</b> |
| ARS-BFGL-NGS-4066      | 26 | 9059815  | 10.32        | <b>13.50</b> | 0.064        | <b>0.115</b> |
| ARS-BFGL-NGS-2464      | 26 | 18709176 | 20.66        | <b>13.07</b> | 0.087        | <b>0.126</b> |
| ARS-BFGL-NGS-77668     | 26 | 18760372 | 22.13        | <b>17.22</b> | 0.098        | <b>0.104</b> |
| ARS-BFGL-NGS-23064     | 26 | 18788121 | 21.97        | <b>16.74</b> | 0.098        | <b>0.103</b> |
| ARS-BFGL-NGS-71584     | 26 | 18863914 | 28.62        | <b>19.66</b> | 0.041        | <b>0.134</b> |
| BTA-62184-no-rs        | 26 | 20014035 | 17.96        | <b>11.22</b> | 0.078        | <b>0.083</b> |
| BTA-60778-no-rs        | 26 | 20090833 | 21.08        | <b>17.89</b> | 0.100        | <b>0.151</b> |
| ARS-BFGL-NGS-25126     | 26 | 20165024 | 14.10        | <b>13.56</b> | 0.049        | <b>0.089</b> |
| ARS-BFGL-NGS-116902    | 26 | 20191815 | 14.47        | <b>13.97</b> | 0.063        | <b>0.090</b> |
| Hapmap31825-BTA-158647 | 26 | 21476707 | <b>13.12</b> | 7.25         | <b>0.174</b> | 0.097        |
| ARS-BFGL-NGS-18603     | 26 | 21853286 | 14.86        | <b>13.52</b> | 0.160        | <b>0.095</b> |
| ARS-BFGL-NGS-116481    | 26 | 22411701 | 10.02        | <b>11.08</b> | 0.184        | <b>0.084</b> |
| Hapmap24832-BTA-138805 | 26 | 22449570 | 10.14        | <b>11.13</b> | 0.184        | <b>0.084</b> |
| BTB-00932332           | 26 | 22551770 | 15.62        | <b>12.20</b> | 0.171        | <b>0.140</b> |
| ARS-BFGL-NGS-107403    | 26 | 23470277 | 18.20        | <b>12.99</b> | 0.138        | <b>0.132</b> |
| BTB-01622498           | 28 | 1436040  | 3.55         | <b>11.44</b> | 0.130        | <b>0.127</b> |
| ARS-BFGL-NGS-43501     | 28 | 17344828 | 14.40        | <b>14.28</b> | 0.099        | <b>0.130</b> |
| ARS-BFGL-NGS-118693    | 28 | 17493199 | 10.91        | <b>12.75</b> | 0.071        | <b>0.100</b> |
| UA-IFASA-6208          | 28 | 27379038 | <b>13.36</b> | 7.50         | <b>0.195</b> | 0.038        |
| BTA-99382-no-rs        | 28 | 41568645 | <b>12.46</b> | 12.19        | <b>0.187</b> | 0.074        |

**In(Fat)**

|                                |    |           |               |               |              |              |
|--------------------------------|----|-----------|---------------|---------------|--------------|--------------|
| Hapmap38956-BTA-43309          | 1  | 98853038  | <b>13.07</b>  | 10.74         | <b>0.212</b> | 0.206        |
| BTB-01562245                   | 1  | 113644592 | <b>11.37</b>  | 9.54          | <b>0.306</b> | 0.290        |
| BTA-104132-no-rs               | 1  | 113669783 | <b>12.14</b>  | 9.85          | <b>0.311</b> | 0.293        |
| ARS-BFGL-BAC-7205              | 1  | 120983738 | <b>12.75</b>  | 9.11          | <b>0.165</b> | 0.117        |
| ARS-BFGL-NGS-88388             | 2  | 13718482  | <b>20.06</b>  | 16.60         | <b>0.162</b> | 0.130        |
| ARS-BFGL-NGS-112315            | 2  | 40959609  | <b>12.90</b>  | 3.87          | <b>0.194</b> | 0.128        |
| ARS-BFGL-NGS-44416             | 2  | 48557519  | <b>11.37</b>  | 7.58          | <b>0.185</b> | 0.121        |
| BTB-00108243                   | 2  | 112019423 | <b>17.58</b>  | <b>22.93</b>  | <b>0.290</b> | <b>0.285</b> |
| BTB-01678000                   | 3  | 6985014   | <b>20.47</b>  | 18.76         | <b>0.166</b> | 0.121        |
| BTB-01678060                   | 3  | 7009487   | <b>19.85</b>  | <b>20.49</b>  | <b>0.196</b> | <b>0.160</b> |
| ARS-BFGL-NGS-5956              | 3  | 8558755   | <b>18.50</b>  | <b>14.08</b>  | <b>0.195</b> | <b>0.147</b> |
| ARS-BFGL-NGS-112616            | 3  | 8598511   | <b>16.94</b>  | <b>12.10</b>  | <b>0.180</b> | <b>0.133</b> |
| Hapmap50814-BTA-89905          | 3  | 41486200  | <b>11.61</b>  | 7.40          | <b>0.197</b> | 0.120        |
| INRA-648                       | 3  | 54347354  | <b>13.24</b>  | <b>12.30</b>  | <b>0.309</b> | <b>0.288</b> |
| Hapmap43441-BTA-103289         | 3  | 61621627  | 17.33         | <b>21.78</b>  | 0.141        | <b>0.137</b> |
| BTA-68164-no-rs                | 3  | 68215262  | <b>12.86</b>  | 6.92          | <b>0.199</b> | 0.110        |
| BTB-00131847                   | 3  | 68241075  | <b>12.93</b>  | 7.45          | <b>0.203</b> | 0.119        |
| BTA-54952-no-rs                | 4  | 11830564  | <b>11.77</b>  | 9.97          | <b>0.184</b> | 0.139        |
| ARS-BFGL-NGS-20815             | 4  | 15021946  | <b>16.20</b>  | 14.19         | <b>0.171</b> | 0.121        |
| ARS-BFGL-NGS-117196            | 4  | 53206872  | 9.67          | <b>11.42</b>  | 0.150        | <b>0.143</b> |
| BTB-01252613                   | 5  | 1851325   | <b>10.90</b>  | 7.03          | <b>0.182</b> | 0.150        |
| Hapmap39895-BTA-15668          | 5  | 15392995  | <b>10.89</b>  | 6.92          | <b>0.189</b> | 0.131        |
| ARS-BFGL-NGS-108617            | 5  | 98082173  | <b>15.13</b>  | <b>11.12</b>  | <b>0.224</b> | <b>0.171</b> |
| ARS-BFGL-NGS-95906             | 5  | 100351926 | <b>20.56</b>  | <b>16.92</b>  | <b>0.192</b> | <b>0.133</b> |
| Hapmap53294-rs29016908         | 5  | 101090418 | <b>39.46</b>  | <b>25.68</b>  | <b>0.178</b> | <b>0.153</b> |
| Hapmap60021-ss46526426         | 5  | 101979581 | <b>21.63</b>  | <b>16.47</b>  | <b>0.200</b> | <b>0.142</b> |
| BTB-00270281                   | 6  | 95770023  | <b>16.41</b>  | 9.91          | <b>0.201</b> | 0.123        |
| Hapmap58150-rs29020620         | 6  | 96724594  | <b>11.60</b>  | 5.12          | <b>0.163</b> | 0.100        |
| BTB-01700063                   | 6  | 99086447  | <b>21.30</b>  | 14.69         | <b>0.237</b> | 0.153        |
| Hapmap53916-rs29021982         | 6  | 99581269  | <b>18.02</b>  | <b>13.96</b>  | <b>0.196</b> | <b>0.150</b> |
| Hapmap48078-BTA-77495          | 6  | 99827767  | <b>13.14</b>  | 12.88         | <b>0.158</b> | 0.116        |
| ARS-BFGL-NGS-14880             | 7  | 53879989  | <b>14.54</b>  | 13.67         | <b>0.240</b> | 0.155        |
| ARS-BFGL-NGS-113181            | 7  | 62800839  | <b>17.30</b>  | 17.77         | <b>0.161</b> | 0.122        |
| BTB-02035459                   | 7  | 63196194  | <b>11.49</b>  | 7.58          | <b>0.152</b> | 0.102        |
| BTB-01219396                   | 7  | 63221359  | <b>11.49</b>  | 7.58          | <b>0.152</b> | 0.102        |
| BTA-12616-no-rs                | 7  | 64712171  | <b>12.78</b>  | 8.69          | <b>0.154</b> | 0.100        |
| ARS-BFGL-NGS-65419             | 7  | 66102696  | <b>16.31</b>  | <b>13.08</b>  | <b>0.191</b> | <b>0.130</b> |
| ARS-BFGL-NGS-12863             | 7  | 68960712  | <b>16.46</b>  | 7.71          | <b>0.215</b> | 0.135        |
| ARS-BFGL-NGS-23091             | 7  | 69342623  | <b>13.36</b>  | 6.96          | <b>0.227</b> | 0.136        |
| BTB-01222854                   | 7  | 74587278  | <b>13.33</b>  | 9.64          | <b>0.218</b> | 0.151        |
| BTA-23130-no-rs                | 7  | 76690557  | <b>11.05</b>  | 5.66          | <b>0.174</b> | 0.096        |
| BTB-01321253                   | 7  | 83625073  | <b>20.03</b>  | 20.87         | <b>0.175</b> | 0.126        |
| Hapmap44053-BTA-28733          | 8  | 6369477   | <b>15.72</b>  | <b>11.82</b>  | <b>0.201</b> | <b>0.183</b> |
| BTB-01184997                   | 8  | 36171902  | <b>11.71</b>  | 9.07          | <b>0.205</b> | 0.141        |
| Hapmap31805-BTA-154485         | 8  | 36232703  | <b>12.94</b>  | 9.44          | <b>0.162</b> | 0.110        |
| Hapmap41758-BTA-116042         | 8  | 37197678  | <b>11.21</b>  | 6.40          | <b>0.224</b> | 0.160        |
| BTB-00384442                   | 9  | 22407445  | <b>10.97</b>  | 7.61          | <b>0.198</b> | 0.127        |
| BTA-83317-no-rs                | 9  | 40393986  | <b>18.23</b>  | 14.82         | <b>0.183</b> | 0.131        |
| BTA-83528-no-rs                | 9  | 41691114  | <b>18.04</b>  | <b>15.22</b>  | <b>0.286</b> | <b>0.207</b> |
| ARS-BFGL-NGS-52530             | 9  | 44230587  | <b>13.85</b>  | 10.44         | <b>0.238</b> | 0.161        |
| Hapmap34441-BES9_Contig154_536 | 9  | 73154820  | <b>12.06</b>  | <b>11.10</b>  | <b>0.175</b> | <b>0.151</b> |
| Hapmap50263-BTA-122214         | 10 | 70455224  | <b>11.11</b>  | 9.21          | <b>0.271</b> | 0.198        |
| Hapmap30370-BTA-99862          | 11 | 14499391  | <b>13.90</b>  | 7.21          | <b>0.213</b> | 0.170        |
| Hapmap33349-BTA-127624         | 12 | 47348606  | 10.61         | <b>11.04</b>  | 0.176        | <b>0.137</b> |
| Hapmap29758-BTC-003619         | 14 | 5261      | <b>39.84</b>  | <b>35.22</b>  | <b>0.234</b> | <b>0.181</b> |
| Hapmap30381-BTC-005750         | 14 | 50873     | <b>59.74</b>  | <b>58.91</b>  | <b>0.274</b> | <b>0.229</b> |
| Hapmap30383-BTC-005848         | 14 | 76704     | <b>64.76</b>  | <b>61.82</b>  | <b>0.276</b> | <b>0.224</b> |
| BTA-34956-no-rs                | 14 | 101474    | <b>29.60</b>  | <b>33.07</b>  | <b>0.223</b> | <b>0.179</b> |
| ARS-BFGL-NGS-57820             | 14 | 236533    | <b>146.22</b> | <b>135.30</b> | <b>0.407</b> | <b>0.327</b> |

|                        |    |          |               |               |              |              |
|------------------------|----|----------|---------------|---------------|--------------|--------------|
| ARS-BFGL-NGS-34135     | 14 | 260342   | <b>78.42</b>  | <b>79.35</b>  | <b>0.307</b> | <b>0.244</b> |
| ARS-BFGL-NGS-94706     | 14 | 281534   | <b>74.85</b>  | <b>76.21</b>  | <b>0.300</b> | <b>0.240</b> |
| ARS-BFGL-NGS-4939      | 14 | 443936   | <b>157.26</b> | <b>144.90</b> | <b>0.430</b> | <b>0.343</b> |
| ARS-BFGL-NGS-71749     | 14 | 596340   | <b>41.92</b>  | <b>40.96</b>  | <b>0.306</b> | <b>0.260</b> |
| ARS-BFGL-NGS-107379    | 14 | 679601   | <b>100.53</b> | <b>86.20</b>  | <b>0.339</b> | <b>0.263</b> |
| ARS-BFGL-NGS-18365     | 14 | 741868   | <b>46.78</b>  | <b>38.21</b>  | <b>0.176</b> | <b>0.159</b> |
| Hapmap30922-BTC-002021 | 14 | 763332   | <b>49.33</b>  | <b>41.41</b>  | <b>0.181</b> | <b>0.175</b> |
| Hapmap25384-BTC-001997 | 14 | 835055   | <b>64.12</b>  | <b>62.10</b>  | <b>0.214</b> | <b>0.208</b> |
| Hapmap24715-BTC-001973 | 14 | 856890   | <b>61.25</b>  | <b>60.82</b>  | <b>0.219</b> | <b>0.210</b> |
| BTA-35941-no-rs        | 14 | 894253   | <b>97.77</b>  | <b>85.15</b>  | <b>0.324</b> | <b>0.255</b> |
| ARS-BFGL-NGS-101653    | 14 | 931163   | <b>41.53</b>  | <b>38.61</b>  | <b>0.279</b> | <b>0.240</b> |
| ARS-BFGL-NGS-26520     | 14 | 996983   | <b>69.06</b>  | <b>65.29</b>  | <b>0.313</b> | <b>0.274</b> |
| UA-IFASA-6878          | 14 | 1044040  | <b>35.95</b>  | 29.85         | <b>0.152</b> | 0.115        |
| ARS-BFGL-NGS-22866     | 14 | 1131951  | <b>44.65</b>  | <b>45.92</b>  | <b>0.266</b> | <b>0.201</b> |
| ARS-BFGL-NGS-103064    | 14 | 1193335  | <b>62.36</b>  | <b>64.75</b>  | <b>0.229</b> | <b>0.242</b> |
| ARS-BFGL-NGS-3122      | 14 | 1264232  | <b>34.28</b>  | <b>34.89</b>  | <b>0.190</b> | <b>0.220</b> |
| Hapmap25486-BTC-072553 | 14 | 1285036  | <b>34.91</b>  | <b>40.10</b>  | <b>0.227</b> | <b>0.221</b> |
| Hapmap30646-BTC-002054 | 14 | 1461084  | <b>68.84</b>  | <b>57.75</b>  | <b>0.299</b> | <b>0.242</b> |
| Hapmap30086-BTC-002066 | 14 | 1490177  | <b>110.42</b> | <b>94.52</b>  | <b>0.310</b> | <b>0.255</b> |
| Hapmap30374-BTC-002159 | 14 | 1546590  | <b>89.68</b>  | <b>76.49</b>  | <b>0.320</b> | <b>0.243</b> |
| ARS-BFGL-NGS-74378     | 14 | 1889209  | <b>48.22</b>  | <b>36.95</b>  | <b>0.205</b> | <b>0.172</b> |
| ARS-BFGL-NGS-117542    | 14 | 1913107  | <b>28.04</b>  | <b>26.03</b>  | <b>0.215</b> | <b>0.189</b> |
| UA-IFASA-9288          | 14 | 2201869  | <b>48.16</b>  | <b>32.53</b>  | <b>0.183</b> | <b>0.167</b> |
| Hapmap24777-BTC-064977 | 14 | 2261622  | <b>13.82</b>  | <b>12.31</b>  | <b>0.166</b> | <b>0.163</b> |
| Hapmap32970-BTC-064990 | 14 | 2288509  | <b>32.04</b>  | <b>27.00</b>  | <b>0.167</b> | <b>0.164</b> |
| Hapmap24986-BTC-065021 | 14 | 2313594  | <b>32.04</b>  | <b>27.00</b>  | <b>0.167</b> | <b>0.164</b> |
| ARS-BFGL-NGS-22111     | 14 | 2347218  | 18.98         | <b>18.88</b>  | 0.122        | <b>0.140</b> |
| UA-IFASA-7269          | 14 | 2370255  | 18.98         | <b>18.88</b>  | 0.122        | <b>0.140</b> |
| Hapmap26072-BTC-065132 | 14 | 2391825  | 23.93         | <b>24.54</b>  | 0.144        | <b>0.156</b> |
| ARS-BFGL-NGS-113575    | 14 | 2484498  | <b>34.94</b>  | <b>31.97</b>  | <b>0.178</b> | <b>0.164</b> |
| ARS-BFGL-NGS-118081    | 14 | 2511264  | <b>41.44</b>  | <b>40.47</b>  | <b>0.238</b> | <b>0.199</b> |
| ARS-BFGL-NGS-56327     | 14 | 2580413  | <b>60.00</b>  | <b>53.41</b>  | <b>0.219</b> | <b>0.199</b> |
| ARS-BFGL-NGS-100480    | 14 | 2607582  | <b>74.83</b>  | <b>67.79</b>  | <b>0.253</b> | <b>0.223</b> |
| UA-IFASA-5306          | 14 | 2711614  | <b>47.61</b>  | <b>32.91</b>  | <b>0.204</b> | <b>0.185</b> |
| Hapmap27703-BTC-053907 | 14 | 2826072  | 26.82         | <b>24.14</b>  | 0.131        | <b>0.133</b> |
| Hapmap22692-BTC-068210 | 14 | 3018725  | <b>36.74</b>  | <b>24.94</b>  | <b>0.167</b> | <b>0.142</b> |
| Hapmap23302-BTC-052123 | 14 | 3099634  | <b>35.66</b>  | <b>21.05</b>  | <b>0.186</b> | <b>0.154</b> |
| UA-IFASA-6329          | 14 | 3465238  | <b>25.62</b>  | <b>19.44</b>  | <b>0.200</b> | <b>0.159</b> |
| ARS-BFGL-NGS-3571      | 14 | 3587017  | <b>26.26</b>  | <b>20.08</b>  | <b>0.208</b> | <b>0.163</b> |
| ARS-BFGL-NGS-110563    | 14 | 3799229  | <b>25.21</b>  | <b>17.13</b>  | <b>0.216</b> | <b>0.161</b> |
| Hapmap32262-BTC-066621 | 14 | 3834070  | <b>13.02</b>  | 8.96          | <b>0.185</b> | 0.139        |
| ARS-BFGL-NGS-115947    | 14 | 3865963  | <b>33.68</b>  | <b>21.03</b>  | <b>0.225</b> | <b>0.177</b> |
| Hapmap51646-BTA-86764  | 14 | 4302230  | 23.90         | <b>16.80</b>  | 0.128        | <b>0.129</b> |
| Hapmap30988-BTC-056315 | 14 | 4693900  | <b>20.21</b>  | <b>18.28</b>  | <b>0.205</b> | <b>0.158</b> |
| ARS-BFGL-NGS-110894    | 14 | 5282437  | <b>14.60</b>  | 9.05          | <b>0.197</b> | 0.149        |
| UA-IFASA-6647          | 14 | 5808643  | <b>21.04</b>  | 13.97         | <b>0.152</b> | 0.111        |
| ARS-BFGL-NGS-102953    | 14 | 5867265  | <b>18.86</b>  | 10.66         | <b>0.157</b> | 0.114        |
| ARS-BFGL-NGS-16622     | 15 | 64781292 | <b>11.60</b>  | 9.80          | <b>0.191</b> | 0.153        |
| Hapmap54310-rs29012181 | 16 | 8166691  | 9.54          | <b>10.99</b>  | 0.195        | <b>0.138</b> |
| ARS-BFGL-NGS-56645     | 16 | 23920210 | <b>11.94</b>  | 8.17          | <b>0.172</b> | 0.098        |
| ARS-BFGL-NGS-26559     | 16 | 33367687 | <b>11.84</b>  | <b>12.32</b>  | <b>0.187</b> | <b>0.148</b> |
| BTA-16056-no-rs        | 17 | 20423826 | 11.69         | <b>11.86</b>  | 0.368        | <b>0.345</b> |
| ARS-BFGL-NGS-91287     | 18 | 10052638 | <b>17.05</b>  | <b>15.68</b>  | <b>0.247</b> | <b>0.154</b> |
| ARS-BFGL-NGS-111247    | 19 | 43146804 | <b>14.75</b>  | 12.96         | <b>0.158</b> | 0.109        |
| ARS-BFGL-NGS-24479     | 19 | 45901285 | <b>11.53</b>  | 6.99          | <b>0.188</b> | 0.114        |
| ARS-BFGL-NGS-113693    | 19 | 45926259 | <b>12.69</b>  | 7.75          | <b>0.188</b> | 0.114        |
| Hapmap48608-BTA-111028 | 20 | 52535573 | 12.23         | <b>16.55</b>  | 0.159        | <b>0.144</b> |
| BTA-12959-no-rs        | 21 | 10922512 | <b>12.62</b>  | 9.98          | <b>0.154</b> | 0.108        |
| ARS-BFGL-NGS-101900    | 21 | 30314497 | <b>12.91</b>  | 7.10          | <b>0.153</b> | 0.096        |
| ARS-BFGL-NGS-55374     | 25 | 28795160 | <b>14.21</b>  | 10.68         | <b>0.238</b> | 0.161        |

|                        |    |          |              |              |              |              |
|------------------------|----|----------|--------------|--------------|--------------|--------------|
| ARS-BFGL-NGS-39397     | 26 | 21166268 | <b>13.43</b> | <b>12.13</b> | <b>0.163</b> | <b>0.147</b> |
| Hapmap46411-BTA-15820  | 26 | 21404446 | <b>14.57</b> | <b>12.21</b> | <b>0.197</b> | <b>0.179</b> |
| Hapmap31825-BTA-158647 | 26 | 21476707 | <b>15.83</b> | <b>12.66</b> | <b>0.151</b> | <b>0.143</b> |
| ARS-BFGL-NGS-110077    | 26 | 21729361 | <b>14.14</b> | <b>16.15</b> | <b>0.180</b> | <b>0.149</b> |
| ARS-BFGL-NGS-116481    | 26 | 22411701 | <b>22.85</b> | <b>23.56</b> | <b>0.159</b> | <b>0.133</b> |
| Hapmap24832-BTA-138805 | 26 | 22449570 | <b>23.76</b> | <b>24.42</b> | <b>0.159</b> | <b>0.133</b> |
| ARS-BFGL-NGS-6259      | 26 | 22492302 | <b>21.29</b> | <b>22.06</b> | <b>0.159</b> | <b>0.133</b> |
| ARS-BFGL-NGS-1092      | 26 | 24837303 | <b>16.65</b> | <b>19.74</b> | <b>0.195</b> | <b>0.146</b> |
| UA-IFASA-4715          | 26 | 25330026 | 16.09        | <b>18.89</b> | 0.128        | <b>0.121</b> |
| ARS-BFGL-NGS-38386     | 26 | 32836475 | 7.32         | <b>11.01</b> | 0.134        | <b>0.157</b> |
| ARS-BFGL-NGS-105944    | 26 | 34196569 | <b>11.54</b> | 8.78         | <b>0.221</b> | 0.146        |
| ARS-BFGL-NGS-53731     | 26 | 37801879 | 13.47        | <b>15.29</b> | 0.131        | <b>0.140</b> |
| UA-IFASA-6208          | 28 | 27379038 | <b>12.29</b> | 8.03         | <b>0.169</b> | 0.117        |

#### In(Milk)

|                        |    |           |               |               |              |              |
|------------------------|----|-----------|---------------|---------------|--------------|--------------|
| ARS-BFGL-BAC-13578     | 1  | 121811393 | <b>14.00</b>  | <b>12.21</b>  | <b>0.197</b> | <b>0.168</b> |
| ARS-BFGL-NGS-86079     | 2  | 19126180  | <b>13.56</b>  | 7.17          | <b>0.203</b> | 0.172        |
| Hapmap53232-rs29020795 | 2  | 19202356  | <b>12.37</b>  | 8.78          | <b>0.177</b> | 0.149        |
| Hapmap60669-rs29018484 | 2  | 20687353  | <b>14.57</b>  | 10.61         | <b>0.346</b> | 0.238        |
| ARS-BFGL-NGS-75548     | 4  | 78246158  | <b>15.29</b>  | 8.67          | <b>0.462</b> | 0.309        |
| ARS-BFGL-NGS-115922    | 5  | 29921450  | 10.99         | <b>11.43</b>  | 0.278        | <b>0.228</b> |
| BTA-75680-no-rs        | 6  | 31470687  | <b>11.54</b>  | 6.24          | <b>0.161</b> | 0.101        |
| Hapmap54442-rs29025673 | 6  | 31579806  | <b>12.50</b>  | 7.42          | <b>0.161</b> | 0.101        |
| UA-IFASA-2111          | 6  | 85289127  | <b>14.17</b>  | 11.85         | <b>0.195</b> | 0.119        |
| Hapmap25708-BTC-043671 | 6  | 88263655  | <b>11.20</b>  | 10.56         | <b>0.215</b> | 0.109        |
| Hapmap40845-BTA-97263  | 6  | 92788189  | <b>11.64</b>  | 5.88          | <b>0.203</b> | 0.125        |
| BTB-01428914           | 6  | 93850918  | <b>12.73</b>  | 7.77          | <b>0.159</b> | 0.092        |
| Hapmap53417-rs29014877 | 7  | 106039868 | <b>12.83</b>  | 10.48         | <b>0.168</b> | 0.106        |
| ARS-BFGL-NGS-4062      | 8  | 5505897   | 7.21          | <b>11.81</b>  | 0.207        | <b>0.159</b> |
| Hapmap31053-BTA-111664 | 9  | 27739862  | <b>14.86</b>  | 10.09         | <b>0.197</b> | 0.139        |
| BTA-59878-no-rs        | 9  | 44095822  | <b>11.31</b>  | 8.53          | <b>0.165</b> | 0.142        |
| ARS-BFGL-NGS-52530     | 9  | 44230587  | <b>12.96</b>  | <b>12.03</b>  | <b>0.285</b> | <b>0.201</b> |
| ARS-BFGL-NGS-38561     | 9  | 45373250  | 8.38          | <b>11.34</b>  | 0.140        | <b>0.131</b> |
| BTA-10828-no-rs        | 9  | 46600974  | <b>16.48</b>  | <b>17.49</b>  | <b>0.169</b> | <b>0.157</b> |
| Hapmap24524-BTA-107865 | 9  | 47934344  | 8.70          | <b>13.36</b>  | 0.126        | <b>0.120</b> |
| ARS-BFGL-NGS-62628     | 9  | 82136926  | 10.01         | <b>11.28</b>  | 0.157        | <b>0.139</b> |
| ARS-BFGL-NGS-78549     | 11 | 106534689 | <b>12.86</b>  | <b>11.55</b>  | <b>0.250</b> | <b>0.185</b> |
| ARS-BFGL-BAC-12483     | 13 | 1310816   | 14.05         | <b>15.25</b>  | 0.157        | <b>0.156</b> |
| BTA-15911-no-rs        | 13 | 1371524   | 12.94         | <b>12.38</b>  | 0.170        | <b>0.146</b> |
| ARS-BFGL-NGS-56157     | 13 | 63208626  | <b>13.37</b>  | 5.20          | <b>0.172</b> | 0.079        |
| Hapmap54034-rs29026486 | 13 | 65183781  | <b>14.01</b>  | 4.09          | <b>0.192</b> | 0.076        |
| ARS-BFGL-NGS-103635    | 13 | 67816926  | <b>12.80</b>  | 4.96          | <b>0.163</b> | 0.076        |
| Hapmap29758-BTC-003619 | 14 | 5261      | <b>42.73</b>  | <b>42.44</b>  | <b>0.184</b> | <b>0.139</b> |
| Hapmap30381-BTC-005750 | 14 | 50873     | <b>47.35</b>  | <b>38.59</b>  | <b>0.295</b> | <b>0.235</b> |
| Hapmap30383-BTC-005848 | 14 | 76704     | <b>132.62</b> | <b>116.70</b> | <b>0.386</b> | <b>0.277</b> |
| BTA-34956-no-rs        | 14 | 101474    | <b>69.69</b>  | <b>49.64</b>  | <b>0.300</b> | <b>0.231</b> |
| ARS-BFGL-NGS-94706     | 14 | 281534    | <b>110.80</b> | <b>85.22</b>  | <b>0.326</b> | <b>0.241</b> |
| ARS-BFGL-NGS-107379    | 14 | 679601    | <b>170.53</b> | <b>162.75</b> | <b>0.402</b> | <b>0.299</b> |
| ARS-BFGL-NGS-18365     | 14 | 741868    | <b>38.59</b>  | 45.89         | <b>0.204</b> | 0.112        |
| Hapmap30922-BTC-002021 | 14 | 763332    | <b>28.82</b>  | 33.10         | <b>0.188</b> | 0.096        |
| Hapmap25384-BTC-001997 | 14 | 835055    | <b>86.77</b>  | <b>65.63</b>  | <b>0.304</b> | <b>0.183</b> |
| Hapmap24715-BTC-001973 | 14 | 856890    | <b>77.38</b>  | <b>57.27</b>  | <b>0.299</b> | <b>0.183</b> |
| BTA-35941-no-rs        | 14 | 894253    | <b>84.21</b>  | <b>90.38</b>  | <b>0.255</b> | <b>0.194</b> |
| ARS-BFGL-NGS-101653    | 14 | 931163    | <b>49.12</b>  | <b>42.64</b>  | <b>0.238</b> | <b>0.168</b> |
| ARS-BFGL-NGS-26520     | 14 | 996983    | <b>56.71</b>  | <b>48.24</b>  | <b>0.218</b> | <b>0.139</b> |
| UA-IFASA-6878          | 14 | 1044040   | <b>85.46</b>  | <b>86.53</b>  | <b>0.265</b> | <b>0.190</b> |
| ARS-BFGL-NGS-22866     | 14 | 1131951   | <b>54.37</b>  | <b>48.14</b>  | <b>0.204</b> | <b>0.189</b> |
| ARS-BFGL-NGS-3122      | 14 | 1264232   | <b>55.37</b>  | <b>35.73</b>  | <b>0.272</b> | <b>0.131</b> |
| Hapmap25486-BTC-072553 | 14 | 1285036   | <b>53.65</b>  | <b>31.62</b>  | <b>0.277</b> | <b>0.165</b> |
| Hapmap30646-BTC-002054 | 14 | 1461084   | <b>63.96</b>  | <b>69.53</b>  | <b>0.223</b> | <b>0.160</b> |

|                        |    |          |              |              |              |              |
|------------------------|----|----------|--------------|--------------|--------------|--------------|
| Hapmap30086-BTC-002066 | 14 | 1490177  | <b>80.04</b> | <b>85.10</b> | <b>0.253</b> | <b>0.182</b> |
| Hapmap30374-BTC-002159 | 14 | 1546590  | <b>86.76</b> | <b>91.59</b> | <b>0.248</b> | <b>0.196</b> |
| ARS-BFGL-NGS-74378     | 14 | 1889209  | <b>53.11</b> | <b>61.21</b> | <b>0.276</b> | <b>0.191</b> |
| ARS-BFGL-NGS-117542    | 14 | 1913107  | <b>37.97</b> | <b>36.27</b> | <b>0.252</b> | <b>0.190</b> |
| UA-IFASA-9288          | 14 | 2201869  | <b>36.57</b> | 42.92        | <b>0.218</b> | 0.122        |
| Hapmap32970-BTC-064990 | 14 | 2288509  | <b>19.61</b> | 18.23        | <b>0.171</b> | 0.079        |
| Hapmap24986-BTC-065021 | 14 | 2313594  | <b>19.61</b> | 18.23        | <b>0.171</b> | 0.079        |
| Hapmap26527-BTC-005059 | 14 | 2418618  | <b>27.21</b> | <b>25.01</b> | <b>0.186</b> | <b>0.130</b> |
| ARS-BFGL-NGS-113575    | 14 | 2484498  | <b>15.74</b> | 18.23        | <b>0.178</b> | 0.115        |
| ARS-BFGL-NGS-118081    | 14 | 2511264  | <b>27.25</b> | <b>25.05</b> | <b>0.196</b> | <b>0.149</b> |
| ARS-BFGL-NGS-56327     | 14 | 2580413  | <b>38.75</b> | <b>39.00</b> | <b>0.233</b> | <b>0.156</b> |
| ARS-BFGL-NGS-100480    | 14 | 2607582  | <b>48.59</b> | <b>44.93</b> | <b>0.252</b> | <b>0.165</b> |
| ARS-BFGL-NGS-42263     | 14 | 2681399  | <b>24.01</b> | <b>17.93</b> | <b>0.209</b> | <b>0.160</b> |
| UA-IFASA-5306          | 14 | 2711614  | <b>38.68</b> | <b>45.11</b> | <b>0.233</b> | <b>0.145</b> |
| ARS-BFGL-NGS-54400     | 14 | 2736946  | <b>21.70</b> | <b>15.31</b> | <b>0.218</b> | <b>0.151</b> |
| Hapmap22692-BTC-068210 | 14 | 3018725  | <b>36.15</b> | <b>43.09</b> | <b>0.208</b> | <b>0.140</b> |
| Hapmap23302-BTC-052123 | 14 | 3099634  | <b>38.58</b> | <b>51.15</b> | <b>0.215</b> | <b>0.148</b> |
| Hapmap25217-BTC-067767 | 14 | 3189311  | <b>36.24</b> | 21.15        | <b>0.195</b> | 0.076        |
| UA-IFASA-6329          | 14 | 3465238  | <b>26.01</b> | 28.86        | <b>0.170</b> | 0.106        |
| ARS-BFGL-NGS-56339     | 14 | 3498808  | <b>16.13</b> | <b>20.80</b> | <b>0.166</b> | <b>0.134</b> |
| UA-IFASA-8927          | 14 | 3640095  | <b>18.63</b> | 16.26        | <b>0.157</b> | 0.112        |
| Hapmap30091-BTC-005211 | 14 | 3940999  | <b>27.46</b> | 21.04        | <b>0.236</b> | 0.119        |
| ARS-BFGL-BAC-24839     | 14 | 3993201  | <b>22.93</b> | 22.70        | <b>0.173</b> | 0.106        |
| ARS-BFGL-NGS-112858    | 14 | 4956374  | <b>27.34</b> | 35.86        | <b>0.208</b> | 0.133        |
| Hapmap51078-BTA-87682  | 14 | 5064062  | <b>16.06</b> | 12.13        | <b>0.202</b> | 0.110        |
| ARS-BFGL-NGS-55227     | 14 | 5085415  | <b>21.02</b> | 33.40        | <b>0.171</b> | 0.130        |
| Hapmap32236-BTC-049785 | 14 | 5139497  | 20.69        | <b>34.26</b> | 0.149        | <b>0.126</b> |
| ARS-BFGL-BAC-20965     | 14 | 5225005  | <b>23.51</b> | <b>18.01</b> | <b>0.255</b> | <b>0.157</b> |
| Hapmap33635-BTC-049051 | 14 | 5318260  | <b>15.80</b> | 5.33         | <b>0.197</b> | 0.092        |
| Hapmap27091-BTC-048823 | 14 | 5356987  | <b>30.86</b> | 26.34        | <b>0.208</b> | 0.098        |
| Hapmap23851-BTC-048718 | 14 | 5387835  | <b>29.32</b> | 22.85        | <b>0.244</b> | 0.113        |
| Hapmap32234-BTC-048199 | 14 | 5640337  | <b>33.67</b> | <b>36.21</b> | <b>0.217</b> | <b>0.131</b> |
| Hapmap26283-BTC-048098 | 14 | 5696728  | <b>16.56</b> | 27.75        | <b>0.158</b> | 0.107        |
| Hapmap25716-BTC-047850 | 14 | 5937549  | <b>17.19</b> | <b>17.52</b> | <b>0.208</b> | <b>0.123</b> |
| Hapmap23799-BTC-047701 | 14 | 6044245  | <b>12.10</b> | 11.67        | <b>0.222</b> | 0.108        |
| ARS-BFGL-BAC-8730      | 14 | 6252100  | <b>31.45</b> | 21.44        | <b>0.194</b> | 0.106        |
| Hapmap53312-rs29018332 | 14 | 60576872 | <b>20.04</b> | 6.97         | <b>0.166</b> | 0.070        |
| Hapmap43128-BTA-105550 | 15 | 52541506 | <b>12.39</b> | 6.76         | <b>0.160</b> | 0.088        |
| Hapmap59019-rs29021918 | 18 | 41938135 | 10.34        | <b>16.90</b> | 0.128        | <b>0.148</b> |
| Hapmap39811-BTA-122745 | 20 | 35432864 | 10.75        | <b>11.29</b> | 0.170        | <b>0.145</b> |
| BTA-50235-no-rs        | 20 | 35883921 | 7.85         | <b>11.52</b> | 0.237        | <b>0.294</b> |
| BTA-50402-no-rs        | 20 | 36667999 | 8.05         | <b>14.59</b> | 0.152        | <b>0.160</b> |
| Hapmap26466-BTA-160199 | 20 | 36746234 | 8.46         | <b>13.28</b> | 0.163        | <b>0.166</b> |
| BTA-50376-no-rs        | 20 | 36915967 | <b>15.91</b> | <b>20.90</b> | <b>0.168</b> | <b>0.137</b> |
| Hapmap57531-rs29013890 | 20 | 36955574 | <b>13.03</b> | <b>14.21</b> | <b>0.190</b> | <b>0.148</b> |
| ARS-BFGL-NGS-37182     | 22 | 5301596  | <b>11.30</b> | 10.22        | <b>0.282</b> | 0.273        |
| Hapmap43294-BTA-56514  | 23 | 32759583 | <b>11.76</b> | 7.34         | <b>0.311</b> | 0.161        |
| ARS-BFGL-NGS-55374     | 25 | 28795160 | <b>12.33</b> | <b>11.61</b> | <b>0.285</b> | <b>0.201</b> |
| ARS-BFGL-NGS-2127      | 26 | 13563198 | <b>13.62</b> | 10.34        | <b>0.163</b> | 0.130        |
| ARS-BFGL-NGS-2464      | 26 | 18709176 | <b>12.92</b> | <b>10.90</b> | <b>0.154</b> | <b>0.149</b> |
| ARS-BFGL-NGS-77668     | 26 | 18760372 | 19.84        | <b>21.11</b> | 0.139        | <b>0.154</b> |
| ARS-BFGL-NGS-23064     | 26 | 18788121 | 19.17        | <b>19.93</b> | 0.139        | <b>0.154</b> |
| ARS-BFGL-NGS-71584     | 26 | 18863914 | 19.57        | <b>17.19</b> | 0.119        | <b>0.144</b> |
| BTB-00930720           | 26 | 21323659 | <b>12.52</b> | <b>11.21</b> | <b>0.154</b> | <b>0.168</b> |
| Hapmap31825-BTA-158647 | 26 | 21476707 | <b>13.93</b> | <b>11.98</b> | <b>0.165</b> | <b>0.154</b> |
| BTB-00931481           | 26 | 21631982 | 21.92        | <b>19.19</b> | 0.165        | <b>0.170</b> |
| ARS-BFGL-NGS-18603     | 26 | 21853286 | 14.66        | <b>16.99</b> | 0.145        | <b>0.147</b> |
| ARS-BFGL-NGS-114149    | 26 | 22137070 | 5.96         | <b>10.88</b> | 0.109        | <b>0.137</b> |
| BTB-00932332           | 26 | 22551770 | 15.99        | <b>15.53</b> | 0.160        | <b>0.184</b> |
| ARS-BFGL-NGS-107403    | 26 | 23470277 | 18.82        | <b>18.04</b> | 0.171        | <b>0.194</b> |

|                        |    |          |              |              |              |              |
|------------------------|----|----------|--------------|--------------|--------------|--------------|
| BTA-60935-no-rs        | 26 | 23985824 | 17.32        | <b>15.01</b> | 0.142        | <b>0.146</b> |
| ARS-BFGL-NGS-119314    | 26 | 25634039 | 12.11        | <b>14.59</b> | 0.136        | <b>0.157</b> |
| BTB-00935537           | 26 | 26325360 | 17.75        | <b>14.89</b> | 0.102        | <b>0.135</b> |
| Hapmap28763-BTA-162328 | 26 | 26472420 | 9.67         | <b>11.44</b> | 0.111        | <b>0.129</b> |
| ARS-BFGL-NGS-109460    | 27 | 46280579 | <b>13.48</b> | 2.64         | <b>0.174</b> | 0.083        |
| BTB-02080610           | 28 | 19938671 | <b>12.76</b> | 10.74        | <b>0.206</b> | 0.146        |
| Hapmap58649-rs29011010 | 28 | 28185115 | <b>15.98</b> | 8.69         | <b>0.162</b> | 0.125        |

---
